# Supplementary material for: Diurnal cortisol and mental well-being in middle and older age: evidence from four cohort studies
Source: PubMed Central journal article supplement (PMC5652457; doi:10.1136/bmjopen-2017-016085), 2017-10-12
Supplement: bmjopen-2017-016085.draft_revisions.pdf [file bmjopen-2017-016085.draft_revisions.pdf]

# BMJ Open

BMJ Open is committed to open peer review. As part of this commitment we make the peer review history of every article we publish publicly available.

When an article is published we post the peer reviewers' comments and the authors' responses online. We also post the versions of the paper that were used during peer review. These are the versions that the peer review comments apply to.

The versions of the paper that follow are the versions that were submitted during the peer review process. They are not the versions of record or the final published versions. They should not be cited or distributed as the published version of this manuscript.

BMJ Open is an open access journal and the full, final, typeset and author-corrected version of record of the manuscript is available on our site with no access controls, subscription charges or pay-per-view fees (<http://bmjopen.bmj.com>).

If you have any questions on BMJ Open's open peer review process please email [info.bmjopen@bmj.com](mailto:info.bmjopen@bmj.com)

# BMJ Open

## Diurnal cortisol and mental wellbeing in middle and older age: evidence from four cohort studies

|                                 |                                                                                                                                                                                                                                                                                                                                                                                                                                                                                                                                                                                                                                                                                                                                                                                         |
|---------------------------------|-----------------------------------------------------------------------------------------------------------------------------------------------------------------------------------------------------------------------------------------------------------------------------------------------------------------------------------------------------------------------------------------------------------------------------------------------------------------------------------------------------------------------------------------------------------------------------------------------------------------------------------------------------------------------------------------------------------------------------------------------------------------------------------------|
| Journal:                        | <i>BMJ Open</i>                                                                                                                                                                                                                                                                                                                                                                                                                                                                                                                                                                                                                                                                                                                                                                         |
| Manuscript ID                   | bmjopen-2017-016085                                                                                                                                                                                                                                                                                                                                                                                                                                                                                                                                                                                                                                                                                                                                                                     |
| Article Type:                   | Research                                                                                                                                                                                                                                                                                                                                                                                                                                                                                                                                                                                                                                                                                                                                                                                |
| Date Submitted by the Author:   | 30-Jan-2017                                                                                                                                                                                                                                                                                                                                                                                                                                                                                                                                                                                                                                                                                                                                                                             |
| Complete List of Authors:       | Stafford, Mai; University College London, MRC Unit for Lifelong Health and Ageing<br>Ben-Shlomo, Yoav; University of Bristol,<br>Cooper, Cyrus; University of Southampton and Southampton University Hospitals NHS Trust, MRC Lifecourse Epidemiology Unit<br>Gale, Catharine; MRC Epidemiology Resource Centre; University of Edinburgh, Department of Psychology<br>Gardner, Mike; University of Oxford, Nuffield Department of Population Health<br>Geoffroy, Marie-Claude; McGill University, McGill Group for Suicide Studies at Douglas Mental Health University Institute; McGill University, Department of Psychiatry<br>Power, Christine<br>Kuh, Diana; MRC Unit for Lifelong Health and Ageing at UCL,<br>Cooper, Rachel; UCL, MRC Unit for Lifelong Health and Ageing at UCL |
| <b>Primary Subject Heading</b>: | Epidemiology                                                                                                                                                                                                                                                                                                                                                                                                                                                                                                                                                                                                                                                                                                                                                                            |
| Secondary Subject Heading:      | Mental health                                                                                                                                                                                                                                                                                                                                                                                                                                                                                                                                                                                                                                                                                                                                                                           |
| Keywords:                       | meta-analysis, individual participant data, positive psychology                                                                                                                                                                                                                                                                                                                                                                                                                                                                                                                                                                                                                                                                                                                         |
|                                 |                                                                                                                                                                                                                                                                                                                                                                                                                                                                                                                                                                                                                                                                                                                                                                                         |

SCHOLARONE™  
Manuscripts

1  
2  
3 **Diurnal cortisol and mental wellbeing in middle and older age: evidence from four cohort**  
4 **studies**  
5  
6  
7

8 Authors information  
9

10 Mai Stafford<sup>1</sup>, Yoav Ben-Shlomo<sup>2</sup>, Cyrus Cooper<sup>3</sup>, Catharine Gale<sup>3,4</sup>, Michael P. Gardner<sup>5</sup>,  
11 Marie-Claude Geoffroy<sup>6</sup>, Chris Power<sup>7</sup>, Diana Kuh<sup>1</sup>, Rachel Cooper<sup>1</sup>  
12  
13

14  
15 <sup>1</sup>MRC Unit for Lifelong Health and Ageing at UCL, UCL, London, UK  
16

17 <sup>2</sup>School of Social and Community Medicine, University of Bristol, Bristol, UK  
18

19 <sup>3</sup>MRC Lifecourse Epidemiology Unit, University of Southampton, Southampton, UK  
20

21 <sup>4</sup>Department of Psychology, University of Edinburgh, Edinburgh, UK  
22

23 <sup>5</sup>Nuffield Department of Population Health, University of Oxford, Oxford, UK  
24

25 <sup>6</sup>McGill Group for Suicide Studies at Douglas Mental Health University Institute; and  
26 Department of Psychiatry, McGill University, Montréal, Canada  
27

28 <sup>7</sup>Population, Policy and Practice Programme, UCL Great Ormond Street Institute of Child  
29 Health, UCL, London, UK  
30  
31

32  
33 Correspondence to: Dr Mai Stafford, MRC Unit for Lifelong Health and Ageing at UCL, 33  
34 Bedford Place, London, WC1B 5JU; email: [m.stafford@ucl.ac.uk](mailto:m.stafford@ucl.ac.uk); tel: +44 207 570 5712  
35  
36  
37

38 Word count: 3040  
39

40  
41 Number of figures and tables: 3 figures, 2 tables  
42  
43  
44  
45  
46  
47  
48  
49  
50  
51  
52  
53  
54  
55  
56  
57  
58  
59  
60

1  
2  
3 **Diurnal cortisol and mental wellbeing in middle and older age: evidence from four cohort**  
4 **studies**  
5  
6  
7

8 ABSTRACT  
9

10 Objectives: We conducted individual participant meta-analysis to test the hypothesis that  
11 cortisol patterns indicative of dysregulated HPA-axis functioning would be prospectively  
12 associated with poorer wellbeing at follow-up.  
13  
14

15 Setting: Four large UK-based cohort studies  
16

17 Participants: Those providing valid salivary or serum cortisol samples (n=7515 for morning  
18 cortisol; n=1756 for evening cortisol) at baseline (age 44-82) and wellbeing data on the  
19 Warwick Edinburgh Mental Wellbeing Scale at follow-up (0-8 years) were included.  
20  
21

22 Results: Wellbeing was not associated with morning cortisol or diurnal slope though a  
23 borderline association with evening cortisol was found. Adjusting for sex and follow-up time,  
24 each 1 standard deviation increase in evening cortisol was associated with a -0.47 (95% CI -  
25 1.00, 0.05) point lower WEMWBS. This was attenuated by adjustment for body mass index,  
26 smoking and socioeconomic position. Between-study heterogeneity was low.  
27  
28

29 Conclusions: This study does not support the hypothesis that diurnal cortisol is prospectively  
30 associated with wellbeing up to 8 years later. However, replication in prospective studies with  
31 cortisol samples over multiple days is required.  
32  
33  
34  
35  
36

37  
38 Keywords: meta-analysis; individual participant data; positive psychology;  
39  
40  
41  
42  
43  
44  
45  
46  
47  
48  
49  
50  
51  
52  
53  
54  
55  
56  
57  
58  
59  
60

1  
2  
3 Strengths  
4

- 5
- 6 • Individual participant meta-analysis based on 1612-7515 participants with cortisol  
7 data  
8
  - 9 • Prospective study with up to 8 years of follow-up  
10
  - 11 • Validated mental wellbeing instrument based on 14 items capturing hedonic and  
12 eudaimonic components harmonized across cohorts  
13  
14  
15  
16

17  
18  
19  
20 Limitations  
21

- 22
- 23 • Salivary cortisol samples taken over 1 or 2 days; up to a maximum of 4 times per day  
24
  - 25 • Actual waking time not recorded in all studies  
26  
27  
28  
29  
30  
31  
32  
33  
34  
35  
36  
37  
38  
39  
40  
41  
42  
43  
44  
45  
46  
47  
48  
49  
50  
51  
52  
53  
54  
55  
56  
57  
58  
59  
60

## INTRODUCTION

Cortisol is a marker of hypothalamic-pituitary-adrenal (HPA) axis functioning and follows a diurnal rhythm. Large-scale epidemiological studies have measured salivary cortisol sampled several times during the course of a day to capture its rising levels during the awakening response and the subsequent decline across the day. The mental health and wellbeing consequences of raised cortisol levels are of interest particularly among older people given that they have higher evening cortisol levels[1,2] and greater total cortisol output throughout the day[3] compared with younger people.

Positive mental wellbeing is a multidimensional concept that captures hedonic (e.g. happiness and pain avoidance) and eudemonic (e.g. self-realization and psychologically functioning at potential) aspects of mental health that are distinct from depressive illness.[4,5] Cortisol may be linked to a positive psychological state through its effect on mood-altering neurotransmitters including serotonin.[6] Cortisol also has energy-mobilising properties that may in turn promote mental wellbeing.[7]

Two studies of healthy older people found no association between cortisol levels and positive wellbeing (captured by the positive items of the General Health Questionnaire[8] or by daily positive emotions[9]). A study of women aged 65 and over found that greater eudaimonic wellbeing was associated with flatter cortisol slope over the day, though this was due to lower morning cortisol levels which remained low across the day.[10] All studies were small (less than 200 participants). In younger adults (i.e. 55 years and younger), some studies have found that greater positive affect or happiness was associated with lower total cortisol output[11-14] but others have not.[15,16] These studies have not examined prospective

1  
2  
3 associations between baseline cortisol patterns and wellbeing at follow-up in large,  
4  
5 population-based samples.  
6

7  
8 The aim of the current study was to draw on individual participant data from four  
9  
10 large British cohort studies using meta-analysis to examine the longitudinal associations  
11  
12 between diurnal cortisol and positive mental wellbeing captured by an instrument which  
13  
14 summarizes positive thoughts and feelings from both hedonic and eudemonic perspectives.  
15  
16 We hypothesized that cortisol patterns indicative of disrupted HPA axis functioning (i.e. lower  
17  
18 early morning levels, higher evening levels and less steep decline (i.e. flatter response) across  
19  
20 the day) would be associated with lower wellbeing at follow-up.  
21  
22  
23  
24  
25  
26  
27  
28

## 29 METHODS

### 30 **Cohort studies**

31  
32 We used the four cohort studies from the Healthy Ageing across the Life Course (HALCyon)  
33  
34 cross cohort research programme[17] with data on both cortisol and Warwick Edinburgh  
35  
36 Mental Wellbeing Scale: the Caerphilly Prospective Study (CaPS)[18]; the Hertfordshire Cohort  
37  
38 Study (HCS)[19]; the MRC National Survey of Health and Development (NSHD)[20]; and the  
39  
40 National Child Development Study (NCDS).[21]  
41  
42  
43  
44  
45  
46  
47

#### 48 *Caerphilly Prospective Study (CaPS)*

49  
50 CaPS is a cohort of men who were recruited when they were aged 45–59 years, between 1979  
51  
52 and 1983, from the town of Caerphilly and adjacent villages in South Wales. In the second  
53  
54 wave (1984 – 1988) the original cohort was supplemented with men of a similar age who had  
55  
56 moved into the defined area. Salivary cortisol was assessed at phase 5 of data collection in  
57  
58  
59  
60

1  
2  
3 2000–2004 when participants were aged 65 to 82 years and wellbeing was assessed in 2011  
4  
5 when they were aged 73 to 90 years.  
6  
7

#### 8 9 10 *Hertfordshire Cohort Study (HCS)*

11  
12 HCS is a cohort of men and women born in East, North or West Hertfordshire between 1931  
13  
14 and 1939 whose birth and infant records were available and who were alive and still living in  
15  
16 Hertfordshire in the 1990s. Cortisol was assessed at wave 1 of the data collection (1999–  
17  
18 2004) when participants were aged 60 – 73 years and wellbeing was assessed in 2008 when  
19  
20 they were aged 69 – 78.  
21  
22  
23  
24  
25

#### 26 27 *The MRC National Survey of Health and Development (NSHD)*

28  
29 NSHD is a nationally representative sample of people born in England, Scotland, and Wales  
30  
31 during one week in March 1946 followed prospectively since birth. Cortisol and wellbeing  
32  
33 data were collected in 2008-10 when cohort members were aged 62-64 years.  
34  
35  
36  
37

#### 38 39 *The National Child Development Study (NCDS)*

40  
41 NCDS is a nationally representative sample of people born in England, Scotland, and Wales  
42  
43 during 1 week in March 1958 followed prospectively since birth. Cortisol was assessed as part  
44  
45 of a bio-medical survey (2002–2004) when cohort members were aged 44-45 and wellbeing  
46  
47 was assessed at a follow-up (2008-2009) at mean age of 50.7.  
48  
49  
50  
51

#### 52 53 ***Cortisol***

54  
55 In HCS, just one fasting morning serum cortisol sample was ascertained from each participant,  
56  
57 frozen and subsequently measured by radioimmunoassay. Salivary cortisol samples were  
58  
59  
60



1  
2  
3 collected in CaPS, NSHD and NCDS at multiple times across the day with participants shown  
4  
5 how to collect saliva using plain cotton wool swabs (salivettes) at home. Subjects were asked  
6  
7 to chew on the salivettes for 1-2 min and a saliva sample was obtained. In CaPS, participants  
8  
9 were requested to take samples on waking, 30 minutes later, at 2 pm and 10 pm on two  
10  
11 consecutive days. In NSHD, samples were taken on waking, 30 minutes later and at 9 pm.  
12  
13 Samples in NCDS were taken in the first 45 minutes after waking and 3 hours later. Samples  
14  
15 from CaPS, NSHD and NCDS were frozen and subsequently assayed by radioimmunoassay  
16  
17 done at the University of Dresden which specializes in high through-put cortisol assays.[22]  
18  
19  
20  
21  
22  
23

### 24 ***Mental wellbeing***

25  
26 Positive mental wellbeing was assessed using the Warwick Edinburgh Mental Wellbeing Scale  
27  
28 (WEMWBS) in all four studies. This self-completion scale captures positive affect, satisfying  
29  
30 interpersonal relationships and positive functioning. Items are worded positively and  
31  
32 respondents are asked to indicate how frequently, on a five point scale, they have  
33  
34 experienced each statement over the last two weeks. Statements include “I’ve been feeling  
35  
36 good about myself”, “I’ve been feeling close to other people”, “I’ve been interested in new  
37  
38 things” and “I’ve been feeling optimistic about the future”. Scores theoretically range from 14  
39  
40 to 70 with 70 indicating highest wellbeing. Where three or fewer items were missing, values  
41  
42 were imputed based on the average score for completed items (CaPS n=43; HCS n=52; NSHD  
43  
44 n=84; NCDS n=103). Internal consistency of the scale in all four cohorts was high (Cronbach  
45  
46 alpha=0.91 in HCS, NSHD and NCDS and 0.93 in CaPS.[23] Validation work indicates good  
47  
48 construct validity for a single factor structure as well as good criterion validity and test-retest  
49  
50 reliability and supports its use in general population samples.[24]  
51  
52  
53  
54  
55  
56  
57  
58  
59  
60

### ***Covariates***

Key covariates that might confound the association between cortisol and wellbeing and which had been assessed in each of the cohorts were chosen *a priori*: sex, age at cortisol measurement, follow-up time to measurement of wellbeing, body mass index (BMI), smoking, and adult socio-economic position.[25-27] The covariates were measured at the same wave as cortisol samples unless otherwise stated. BMI was calculated as measured weight divided by the square of height and was categorized into quartiles when there was evidence of deviation from linearity in the association with wellbeing (NSHD, NCDS). Smoking was reported by participants and dichotomized into current smoker vs ex- and never smoker (NCDS smoking data at age 42 years). Adult socioeconomic position was derived from own occupational class (CaPS at age 47-67, HCS at age 60-73, NSHD at age 53 or earlier if missing, NCDS at age 42) and grouped as manual or non-manual occupation (the latter indicating greater socioeconomic advantage).

### ***Initial treatment of the data and standardization***

Cortisol has a marked circadian rhythm and therefore the time of day at which it is sampled will affect its level. In CaPS, NSHD and NCDS actual times when the salivary samples were taken were recorded by participants. Observed values were adjusted for the time of sampling by fitting a linear or polynomial function to the association between cortisol and time of measurement and adding the resulting residuals from the best fit model to the overall mean cortisol value. This gives the estimated cortisol level at the time specified in the protocol for each participant. Morning cortisol (salivary or serum) levels were available in all four cohorts (CaPS, HCS, NSHD and NCDS) and night time values in CaPS and NSHD. For NCDS, the later cortisol measure was taken 3 hours after the morning measure on the same day (around

1  
2  
3 11.15AM) and there was no evening measure. However past publications support the notion  
4  
5 that the diurnal decline over this shorter period is a good surrogate for the decline from  
6  
7 morning till night[28] and hence this measure was used to derive a measure of diurnal slope.  
8  
9  
10 HCS collected serum cortisol, the levels of which are around 20 times higher than the free  
11  
12 cortisol concentrations found in saliva. However, a study on the relationship between serum  
13  
14 and salivary cortisol in healthy individuals[29] showed that correlations were high whether  
15  
16 taken at the same time (>0.90) or 70 minutes apart (0.54—0.94). Those participants who  
17  
18 reported taking cortico-steroid medication were excluded from the analysis sample (CaPS  
19  
20 n=62; HCS n=13; NSHD n=19). In NCDS, participants were excluded from analysis if they  
21  
22 reported taking endocrine system medication (n= 396). Salivary cortisol values greater than  
23  
24 100 nmol/L were removed (CaPS n=5; NSHD n=7; NCDS n=21), since high cortisol values can  
25  
26 have substantial statistical influence on estimates and it is unclear what these high values  
27  
28 represent.[30] Morning salivary cortisol values that were not between 5am and noon were  
29  
30 removed and evening values if they were before 8pm, since these participants may be shift-  
31  
32 workers with substantially different cortisol profiles.[31] In CaPS, cortisol values were  
33  
34 averaged over the same measures obtained on two consecutive days. Early morning salivary  
35  
36 cortisol was computed in CaPS and NSHD as the mean of waking and 30 min samples; to be  
37  
38 comparable, in NCDS the cortisol measure taken within 45 minutes after waking was used. In  
39  
40 HCS morning serum cortisol was used.  
41  
42  
43  
44  
45  
46  
47  
48  
49

50 To be able to combine the cohorts in a meta-analysis, the cortisol values were standardized  
51  
52 by deriving study-specific z-scores. In NCDS, both early and late morning cortisol were  
53  
54 positively skewed, as was night time cortisol in CaPS and NSHD, so values were  $\log_e$   
55  
56 transformed before they were converted to z-scores. In addition to the early morning and  
57  
58  
59  
60

1  
2  
3 night time cortisol measures, we derived the diurnal slope (CaPS, NSHD, NCDS) as early  
4  
5 morning value subtracted from the evening (or late morning in NCDS) value and divided by  
6  
7 the lapsed time period. The overall slope is negative and so positive z-scores indicate a flatter  
8  
9 response.  
10

### 11 12 13 14 15 **Statistical Methods**

16  
17 A two stage meta-analysis was performed. In the first stage, we modelled WEMWBS as a  
18  
19 function of each diurnal cortisol indicator in turn using linear regression in each cohort  
20  
21 separately, with adjustment for i) sex, age at cortisol measurement and follow-up time to the  
22  
23 wellbeing measurement, ii) additional adjustment for BMI, smoking status and  
24  
25 socioeconomic position. There was no evidence of deviation from linearity in the association  
26  
27 between any of the cortisol measures and WEMWBS. There was no evidence of interaction  
28  
29 between sex and any of the cortisol measures. In sensitivity analysis to explore possible bias  
30  
31 arising from missing covariates, we adjusted for sex and age at cortisol and follow-up time i)  
32  
33 using the maximum available sample with cortisol and wellbeing data (results not presented),  
34  
35 ii) using the sample restricted to only those participants that had complete data on all  
36  
37 covariates. Results did not materially differ for these two samples. In the second stage,  
38  
39 cohort-specific estimates were pooled in random-effects meta-analyses[32] chosen a priori  
40  
41 due to the expected heterogeneity between the different studies.  
42  
43  
44  
45  
46  
47  
48  
49

### 50 Sensitivity analyses

51  
52 We corrected regression estimates for regression dilution bias arising from error in the  
53  
54 measurement of cortisol. The reliability ratios were estimated by regressing the cortisol  
55  
56  
57  
58  
59  
60

1  
2  
3 measure on day 2 on the measure on day 1 from CaPS data.[33] This yielded reliability ratios  
4  
5 of 0.554, 0.349 and 0.430 for morning, evening and slope cortisol respectively.  
6  
7  
8  
9

## 10 RESULTS

11  
12 The characteristics of the participants of the four cohorts in the analysis are shown in Table 1.  
13  
14 Age at time of wellbeing measurement ranged from mean (sd) age of 50.7 (0.1) years in NCDS  
15  
16 to 80.1 (3.9) years in CaPS. Mean wellbeing ranged from 49.5 (7.9) in NCDS to 53.3 (10.6) in  
17  
18 CaPS and increased with mean age of the cohort. Mean early morning cortisol values were  
19  
20 similar for the three cohorts (CaPS, NSHD, NCDS) that had measured salivary cortisol.  
21  
22  
23  
24  
25  
26

27 We found no evidence of an association between early morning cortisol and wellbeing in the  
28  
29 individual cohorts in sex, age and follow-up time adjusted models. The overall pooled estimate  
30  
31 was 0.02 (95% CI -0.17,0.21; p=0.8) and there was no evidence of heterogeneity across studies  
32  
33 ( $I^2=2.3$ ; p for heterogeneity=0.4) (Table 2 and Figure 1A). Further adjustment for all covariates  
34  
35 did not affect the overall pooled estimate 0.01 (95% CI -0.22,0.24;  $I^2=18.0$ ; p for  
36  
37 heterogeneity=0.3).  
38  
39  
40  
41  
42

43 Sex, age and follow-up time adjusted associations between evening cortisol and wellbeing in  
44  
45 the individual cohorts were in the expected direction (i.e. higher evening cortisol was  
46  
47 associated with lower wellbeing) in NSHD:-0.33 (95% CI -0.77,0.11); CaPS -0.98 (95% CI -  
48  
49 2.03,0.07). This indicates a weak inverse association between evening cortisol and wellbeing  
50  
51 (Table 2 and Figure 1B). Adjustment for body mass index, smoking and social class attenuated  
52  
53 this association. Again, there was no evidence of heterogeneity across studies ( $I^2=19.1$ ; p for  
54  
55 heterogeneity =0.3).  
56  
57  
58  
59  
60

1  
2  
3  
4  
5 In the pooled analysis a flatter diurnal slope was associated with poorer wellbeing though this  
6 was not statistically significant before or after adjustment for all covariates (Table 2 and Figure  
7 1C). In sensitivity analysis, correcting for regression dilution bias, the sex, age and follow-up  
8 time adjusted associations between cortisol and wellbeing were 0.036, -1.347 and -0.163 for  
9 morning, evening and slope cortisol respectively.  
10  
11  
12  
13  
14  
15  
16  
17  
18  
19

## 20 DISCUSSION

21  
22 Based on meta-analysis of individual participant data from four large cohort studies,  
23 we found some evidence that higher evening cortisol was prospectively associated with lower  
24 positive mental wellbeing in middle and older age. The magnitude of this association was  
25 small (-0.06 standard deviations in wellbeing) in crude analysis though up to -0.17 standard  
26 deviations in wellbeing accounting for possible regression dilution bias. This association was  
27 attenuated by the inclusion of body mass index, smoking and socioeconomic position. It  
28 remains unclear whether obesity is secondary to HPA axis dysregulation so this may represent  
29 over-adjustment for a variable on the explanatory pathway, though obesity is not a key  
30 determinant of wellbeing. Morning cortisol and diurnal slope were not associated with  
31 wellbeing in the current study.  
32  
33  
34  
35  
36  
37  
38  
39  
40  
41  
42  
43  
44

45 Evening cortisol is arguably the least affected by salivary sampling protocol deviations,  
46 which can bias associations between cortisol and wellbeing towards the null.[7] Furthermore,  
47 single-day sampling tends to bias cortisol estimates towards state rather than trait values,[30]  
48 which may also explain the lack of association with wellbeing up to eight years later. Only one  
49 of the included studies captured cortisol profiles on more than one day and this study only on  
50 two days. We examined inter-individual differences in cortisol in relation to wellbeing up to  
51  
52  
53  
54  
55  
56  
57  
58  
59  
60

1  
2  
3 eight years after assessment of cortisol patterns. It is possible that an association between  
4 cortisol and wellbeing would only be evident over a shorter lag time. When measured on the  
5 same day, studies have found higher positive affect among those with lower cortisol  
6 output.[14,34,35] In addition, lower output in the first 45 minutes after waking[8] and total  
7 output across the day[10] has been associated with higher wellbeing over a period of 3-4  
8 weeks. Where intensive study designs have been used to measure intra-individual change  
9 based on serial measurements of both cortisol and wellbeing repeated over multiple days,  
10 some studies find evidence of an inverse association between cortisol output and positive  
11 affect[11,13,36-38] though others do not.[9,15,16] Trait positive affect has been found to  
12 predict higher evening cortisol (in men only)[39] though we are not aware that prospective  
13 association between baseline cortisol and subsequent mental wellbeing has been assessed.  
14 Future studies are warranted in order to examine the longitudinal association between  
15 mental wellbeing and cortisol sampled over multiple days to more accurately capture trait  
16 cortisol.

17  
18  
19  
20  
21  
22  
23  
24  
25  
26  
27  
28  
29  
30  
31  
32  
33  
34  
35  
36  
37  
38  
39  
40  
41  
42  
43  
44  
45  
46  
47  
48  
49  
50  
51  
52  
53  
54  
55  
56  
57  
58  
59  
60

Though the evidence remains inconsistent at present, explanatory pathways include the over-activation of the HPA axis which interacts with the serotonin system and may ultimately result in serotonin depletion, increasing proneness to negative emotional states and reducing positive emotionality.[6,40,41] In addition, it has been proposed that the energy-mobilising properties of cortisol may underlie an association with positive mental wellbeing and that this pathway may be less relevant for understanding an association between cortisol and mental ill health.[7] The evidence base is currently too limited to determine whether diurnal cortisol is related to different components of positive mental wellbeing and to negative mental health in the same way though there is some indication that wellbeing and illbeing do not show the same correlations with cortisol slope.[10] The current

1  
2  
3 study used the Warwick Edinburgh Mental Wellbeing Scale, designed to capture both hedonic  
4  
5 and eudemonic wellbeing over the last two weeks. Future research might explore a wider set  
6  
7 of hedonic and eudemonic components of mental wellbeing, as well as measures of mental ill  
8  
9 health, in a single analytical sample to establish whether they show the same or different  
10  
11 relationships with diurnal cortisol.  
12  
13

14  
15 Other limitations should be acknowledged. There were differences in the protocol for  
16  
17 the collection of cortisol although we did not find evidence of between-study heterogeneity in  
18  
19 the estimates from the meta-analysis (with all  $I^2$  values below 21%). We used clock time but  
20  
21 cortisol patterns are more closely anchored to waking time. Participants were instructed to  
22  
23 provide samples at specified times post-waking but actual waking time was not recorded. In  
24  
25 addition, a maximum of four samples per day were collected and additional measures may  
26  
27 have provided more accurate assessment of diurnal cortisol, especially diurnal slope.  
28  
29

30  
31 Nevertheless, the current study also has strengths. It includes a large number of  
32  
33 participants (ranging from 1756 to 7515 in each analysis and considerably larger than any  
34  
35 previous study), in population-based samples, using harmonized measures of wellbeing and  
36  
37 covariates. Individual participant data meta-analysis was used, which has advantages over  
38  
39 aggregate meta-analysis including greater statistical power and standardization of the  
40  
41 derivation of variables and analytical models.[42]  
42  
43  
44

45  
46 In summary, the findings from this meta-analysis do not provide support for the  
47  
48 hypothesis that cortisol profiles indicative of disrupted HPA axis functioning has strong  
49  
50 associations positive mental wellbeing in healthy middle-aged and older people. Of the three  
51  
52 diurnal cortisol levels considered here, only evening cortisol showed a prospective association  
53  
54 with wellbeing and only in minimally-adjusted analysis. However, cortisol was sampled on  
55  
56 only one or two days and studies with samples across multiple days may find stronger  
57  
58  
59  
60



1  
2  
3  
4  
5  
6  
7  
8  
9  
10  
11  
12  
13  
14  
15  
16  
17  
18  
19  
20  
21  
22  
23  
24  
25  
26  
27  
28  
29  
30  
31  
32  
33  
34  
35  
36  
37  
38  
39  
40  
41  
42  
43  
44  
45  
46  
47  
48  
49  
50  
51  
52  
53  
54  
55  
56  
57  
58  
59  
60

associations if they better characterize cortisol patterns, though it is likely that any associations, if found, will be of modest to moderate magnitude.

For peer review only

**Contributor statement:**

YBS, CC, CG, CP and DK conceptualised the study. MS, YBS, MG, MCG and RC identified the variables, cleaned the data and undertook data analysis. All authors contributed to reviewing and interpreting the results, commenting on the manuscript and approved the final version.

**Competing interests:**

Authors have no conflicts of interest to report.

**Funding:**

MS, RC and DK are supported by the UK Medical Research Council (Programme codes MRC\_MC\_UU\_12019/1; MRC\_MC\_UU\_12019/4; MRC\_MC\_UU\_12019/5). The MRC National Survey of Health and Development is funded by the UK Medical Research Council.

HALCyon was funded by the New Dynamics of Ageing (RES-353-25-0001) and MG was supported by this grant.

Data collection of cortisol in NCDS at 45 years was funded by the United Kingdom Medical Research Council, grant G0000934. This research was supported by the National Institute for Health Research Biomedical Research Centre at Great Ormond Street Hospital for Children NHS Foundation Trust and University College London.

The funders had no role in the study design, data collection, data analysis, data interpretation, writing of the report or the decision to submit the article for publication.

**Data sharing statement:**

MRC National Survey of Health and Development data used in this publication are available to bona fide researchers upon request to the NSHD Data Sharing Committee via a standard application procedure. Further details can be found at <http://www.nshd.mrc.ac.uk/data>. doi: 10.5522/NSHD/Q101; doi:10.5522/NSHD/Q102.

All requests for collaboration on the Caerphilly Prospective Study are reviewed by an independent steering committee (<http://www.bris.ac.uk/social-community-medicine/projects/caerphilly/collaboration/>).

National Child Development Study data are available via registration with the UK Data Service.

The Hertfordshire Cohort Study has governance and access arrangements that comply with MRC data sharing policy. The survey data are accessible to bona fide researchers by contacting Professor Cyrus Cooper, Director of the MRC Lifecourse Epidemiology Unit at the University of Southampton, who can forward a collaborators' agreement.

**Acknowledgements:**

The authors thank Stephanie Black for her contribution to data collation, statistical analysis and interpretation of the results presented here.

The authors are grateful to the Centre for Longitudinal Studies (CLS), UCL Institute of Education for the use of these data and to the UK Data Service for making them available.

1  
2  
3  
4  
5  
6  
7  
8  
9  
10  
11  
12  
13  
14  
15  
16  
17  
18  
19  
20  
21  
22  
23  
24  
25  
26  
27  
28  
29  
30  
31  
32  
33  
34  
35  
36  
37  
38  
39  
40  
41  
42  
43  
44  
45  
46  
47  
48  
49  
50  
51  
52  
53  
54  
55  
56  
57  
58  
59  
60

However, neither CLS nor the UK Data Service bear any responsibility for the analysis or interpretation of these data.

For peer review only

## REFERENCES

1. Lupien S, Lecours AR, Schwartz G, et al. Longitudinal study of basal cortisol levels in healthy elderly subjects: evidence for subgroups. *Neurobiol Aging* 1996;17:95–105.
2. Herbert J, Goodyer IM, Grossman, AB, et al, Do corticosteroids damage the brain? *J Neuroendocrinol* 2006;18:393-411.
3. Kumari M, Badrick E, Sacker A, et al. 2010a. Identifying patterns in cortisol secretion in an older population. Findings from the Whitehall II study. *Psychoneuroendocrinology* 2010;35:1091-9.
4. Ryff CD, Singer B. The contours of positive human health. *Psychol Inq* 1998;9:1-28.
5. Huppert FA, Whittington JE. Evidence for the independence of positive and negative well-being: implications for quality of life assessment. *Br J Health Psychol* 2003;8:107-22.
6. Braquehais MD, Picouto MD, Casas M, et al. Sher, L., 2012. Hypothalamic-pituitary-adrenal axis dysfunction as a neurobiological correlate of emotion dysregulation in adolescent suicide. *World J. Pediatr.* 8, 197-206.
7. Smyth N, Thorn L, Hucklebridge F, et al. Post awakening salivary cortisol secretion and trait well-being: The importance of sample timing accuracy. *Psychoneuroendocrinology* 2015;58:141-51.
8. Evans P, Forte D, Jacobs C, et al. Cortisol secretory activity in older people in relation to positive and negative well-being. *Psychoneuroendocrinology* 2007;32:922-930.
9. Adam EK, Hawkey LC, Kudielka BM, et al. Day-to-day dynamics of experience – cortisol associations in a population-based sample of older adults. *Proc Natl Acad Sci USA* 2006;103:17058-63.

- 1  
2  
3 10. Ryff CD, Love GD, Urry HL, et al. Psychological well-being and ill-being: do they have  
4 distinct or mirrored biological correlates? *Psychother Psychosom* 2006;75:85–95.  
5  
6  
7  
8  
9 11. Smyth J, Ockenfels MC, Porter L, et al. Stressors and mood measured on a momentary  
10 basis are associated with salivary cortisol secretion. *Psychoneuroendocrinology* 1998;23:353–  
11 370.  
12  
13  
14  
15 12. Lai JC, Evans PD, Ng SH, et al. Optimism, positive affectivity, and salivary cortisol. *Br J*  
16 *Health Psychol* 2005;10:467-84.  
17  
18  
19  
20  
21 13. Steptoe A, Wardle J. Positive affect and biological function in everyday life. *Neurobiol*  
22 *Aging* 2005;26 Suppl 1:108-12.  
23  
24  
25  
26 14. Steptoe A, Wardle J, Marmot M, et al. Positive affect and health-related neuroendocrine,  
27 cardiovascular, and inflammatory processes. *Proc Natl Acad Sci USA* 2005;102(18):6508-12.  
28  
29  
30  
31 15. van Eck M, Berkhof H, Nicolson N, et al. The effects of perceived stress, traits, mood  
32 states, and stressful daily events on salivary cortisol. *Psychosom Med* 1996;58:447-58.  
33  
34  
35  
36 16. Jacobs N, Myin-Germeys I, Derom C, et al. A momentary assessment study of the  
37 relationship between affective and adrenocortical stress responses in daily life. *Biol Psychol*  
38 2007;74:60–66.  
39  
40  
41  
42  
43 17. Kuh D, Cooper R, Richards M, et al. A life course approach to healthy ageing: the HALCyon  
44 programme. *Public Health* 2012;126:193-5.  
45  
46  
47  
48  
49 18. The Caerphilly and Speedwell Collaborative Group. Caerphilly and Speedwell collaborative  
50 heart disease studies. *J Epidemiol Community Health* 1984;38:259–262.  
51  
52  
53  
54 19. Syddall HE, Aihie SA, Dennison EM, et al. Cohort profile: the Hertfordshire cohort study.  
55 *Int J Epidemiol* 2005;34:1234—1242.  
56  
57  
58  
59  
60

- 1  
2  
3 20. Kuh D, Pierce M, Adams J, et al. Cohort Profile: updating the cohort profile for the MRC  
4 National Survey of Health and Development: a new clinic-based data collection for ageing  
5 research. *Int J Epidemiol* 2011;40:e1—e9.  
6  
7  
8  
9  
10 21. Power C, Elliott J. Cohort profile: 1958 British birth cohort (National Child Development  
11 Study). *Int J Epidemiol* 2006;35:34-41.  
12  
13  
14  
15 22. Kirschbaum C, Hellhammer DH. Salivary cortisol in psychobiological research: an overview.  
16 *Neuropsychobiology* 1989;22:150—169.  
17  
18  
19  
20  
21 23. Gale CR, Cooper R, Craig L, et al. Cognitive function in childhood and lifetime cognitive  
22 change in relation to mental wellbeing in four cohorts of older people. *PLoS One*  
23 2012;7(9):e44860.  
24  
25  
26  
27  
28 24. Tennant R, Hiller L, Fishwick R, et al. The Warwick-Edinburgh Mental Well-being Scale  
29 (WEMWBS): development and UK validation. *Health Qual. Life Outcomes* 2007;27(5):63.  
30  
31  
32  
33 25. Badrick E, Bobak M, Britton A, et al. The relationship between alcohol consumption and  
34 cortisol secretion in an aging cohort. *J Clin Endocrinol Metab* 2008;93:750—757.  
35  
36  
37  
38 26. Kumari M, Badrick E, Chandola T, et al. Measures of social position and cortisol secretion  
39 in an aging population: findings from the Whitehall II study. *Psychosom Med* 2010;72:27-34.  
40  
41  
42  
43 27. Geoffroy MC, Li L, Power C. Depressive symptoms and body mass index: co-morbidity and  
44 direction of association in a British birth cohort followed over 50 years. *Psychol Med*  
45 2014;44:2641-2652.  
46  
47  
48  
49  
50 28. Power C, Li L, Hertzman C. Cognitive development and cortisol patterns in mid-life:  
51 findings from a British birth cohort. *Psychoneuroendocrinology* 2008;33:530-9.  
52  
53  
54  
55  
56 29. Reid JD, Intrieri RC, Susman EJ, et al. The relationship of serum and salivary cortisol in a  
57 sample of healthy elderly. *J Gerontol* 1992;47:176—179.  
58  
59  
60

- 1  
2  
3  
4  
5 30. Adam EK, Kumari M. Assessing salivary cortisol in large-scale, epidemiological research.  
6  
7 *Psychoneuroendocrinology* 2009;34:1423-36.  
8  
9  
10 31. Bostock S, Steptoe A. Influences of early shift work on the diurnal cortisol rhythm, mood  
11 and sleep: Within-subject variation in male airline pilots. *Psychoneuroendocrinology*  
12 2013;38:533-541  
13  
14  
15  
16  
17 32. DerSimonian R, Laird N. Meta-analysis in clinical trials. *Control Clin Trials* 1986;7:177-88.  
18  
19  
20  
21 33. Berglund L. Regression dilution bias: Tools for correction methods and sample size  
22 calculation. *Upsala J Med Sci* 2012;117:279-83.  
23  
24  
25  
26 34. Steptoe A, Gibson EL, Hamer M, et al. Neuroendocrine and cardiovascular correlates of  
27 positive affect measured by ecological momentary assessment and by questionnaire.  
28  
29 *Psychoneuroendocrinology* 2007;32:56-64.  
30  
31  
32  
33 35. Steptoe A, O'Donnell K, Badrick E, et al. Neuroendocrine and inflammatory factors  
34 associated with positive affect in healthy men and women: the Whitehall II study. *Am J*  
35 *Epidemiol* 2008;167:96-102.  
36  
37  
38  
39  
40 36. Hoppmann CA, Klumb PL. Daily goal pursuits predict cortisol secretion and mood states in  
41 employed parents with preschool children. *Psychosom Med* 2006;68:887-94.  
42  
43  
44  
45 37. Davydov DM, Shapiro D, Goldstein IB, et al. Moods in everyday situations: effects of  
46 menstrual cycle, work, and stress hormones. *J Psychosom Res* 2005;58:343-349.  
47  
48  
49  
50  
51 38. Simpson EE, McConville C, Rae, G., et al. Salivary cortisol, stress and mood in healthy older adults:  
52 the Zenith study. *Biol Psychol* 2008;78(1):1-9  
53  
54  
55  
56 39. Polk DE, Cohen S, Doyle WJ, et al. State and trait affect as predictors of salivary cortisol in  
57 healthy adults. *Psychoneuroendocrinology* 2005;30:261-272.  
58  
59  
60

1  
2  
3  
4  
5 40. Dinan TG. Glucocorticoids and the genesis of depressive illness. A psychobiological model.  
6  
7 *Br J Psych* 1994;164:365-71.  
8

9  
10 41. Stokes PE. The potential role of excessive cortisol induced by HPA hyperfunction in the  
11  
12 pathogenesis of depression. *Eur Neuropsychopharm* 1995;77-82.  
13

14  
15 42. Riley RD, Lambert PC, Abo-Zaid G. Meta-analysis of individual participant data: rationale,  
16  
17 conduct, and reporting. *Br Med J* 2010;340, 221.  
18  
19

20  
21  
22  
23  
24  
25  
26  
27  
28  
29  
30  
31  
32  
33  
34  
35  
36  
37  
38  
39  
40  
41  
42  
43  
44  
45  
46  
47  
48  
49  
50  
51  
52  
53  
54  
55  
56  
57  
58  
59  
60

peer review only



Table 1: Descriptive statistics of participants by study

|                                                               | CaPS                    | HCS                     | NSHD                    | NCDS                   |
|---------------------------------------------------------------|-------------------------|-------------------------|-------------------------|------------------------|
| Sample with WEMWBS and cortisol; n                            | 592                     | 1055                    | 1736                    | 5337                   |
| Gender; n(%) male                                             | 530 (100)               | 463 (44)                | 809 (47)                | 2464 (50)              |
| Age range at cortisol measurement (years)                     | 70 - 82                 | 60 - 73                 | 62 - 64                 | 44 - 46                |
| Age range at WEMWBS assessment (years); [mean (sd)]           | 73 - 90<br>[80.1 (3.9)] | 69 - 78<br>[73.2 (2.4)] | 62 - 64<br>[63.6 (0.8)] | 50 - 51<br>[50.7(0.1)] |
| BMI (kg/m <sup>2</sup> ); mean(sd)                            | 28.2 (3.8)              | 26.9 (4.2)              | 27.9 (4.8)              | 27.1 (4.7)             |
| Adult current smoking status; n (%) smoker                    | 53 (11.0)               | 84 (8.1)                | 160 (10.2)              | 893 (18.5)             |
| Adult social class; n(%) manual                               | 303 (59.5)              | 400 (39)                | 499 (29.2)              | 1626 (34.1)            |
| WEMWBS score; mean (sd)                                       | 53.3 (10.6)             | 51.7 (8.1)              | 51.8 (8.0)              | 49.5 (7.9)             |
| Sampling times; mean                                          |                         |                         |                         |                        |
| Waking sample                                                 | 7.37AM                  | N/A                     | 7.11AM                  | N/A                    |
| Waking + 30mins (+45 mins for NCDS)                           | 8.13AM                  |                         | 7.42AM                  | 8.11AM                 |
| Waking + 3h 45 mins                                           | N/A                     |                         | N/A                     | 11:11AM                |
| 2pm sample                                                    | 2.11PM                  |                         | N/A                     | N/A                    |
| Evening sample                                                | 10.05PM                 |                         | 9.27PM                  | N/A                    |
| Serum cortisol (nmol/L)                                       | N/A                     | 258.1 (81.2)            | N/A                     | N/A                    |
| Salivary cortisol (nmol/L)                                    |                         |                         |                         |                        |
| Early morning; mean (sd)                                      | 19.7 (9.5)              |                         | 22.9 (9.6)              | 21.3 (10.8)            |
| Night time; median (IQR)                                      | 2.3 (1.5, 3.5)          |                         | 2.4 (1.7,3.7)           | N/A                    |
| Diurnal slope (nmol/L/h); mean (sd)                           | -1.13 (0.7)             |                         | -1.43 (0.7)             | -4.3 (3.8)             |
| Cortisol Awakening Response; mean (sd)                        | 2.3 (9.4)               |                         | 6.4 (11.7)              | N/A                    |
| Exclusions due to being on corticosteroids; n(%) <sup>a</sup> | 62 (10%)                | 13 (1.2%)               | 19(1.1%)                | 396 (7.5) <sup>a</sup> |
| <sup>a</sup> endocrine medication                             |                         |                         |                         |                        |

Table 2. Overall summary estimates of effect for the associations between cortisol measures and wellbeing from a series of meta-analyses.

|                        | Included cohorts | Number of individuals | Mean difference in WEMWBS score (95% CI) per SD increase in cortisol |         |                        |                      |                                 |         |                        |                      |
|------------------------|------------------|-----------------------|----------------------------------------------------------------------|---------|------------------------|----------------------|---------------------------------|---------|------------------------|----------------------|
|                        |                  |                       | Model 1 <sup>a</sup>                                                 |         |                        |                      | Model 2 <sup>b</sup>            |         |                        |                      |
|                        |                  |                       | Regression coefficient (95% CI)                                      | P-value | Tests of heterogeneity | P-value <sup>c</sup> | Regression coefficient (95% CI) | P-value | Tests of heterogeneity | P-value <sup>c</sup> |
|                        |                  |                       |                                                                      |         | I <sup>2</sup> (%)     |                      |                                 |         | I <sup>2</sup> (%)     |                      |
| Early morning cortisol | All              | 7515                  | 0.02<br>(-0.17,0.21)                                                 | 0.8     | 2.3                    | 0.4                  | 0.01<br>(-0.22,0.24)            | 0.9     | 18.0                   | 0.3                  |
| Evening cortisol       | CaPS             | 1756                  | -0.47<br>(-1.00,0.05)                                                | 0.08    | 20.3                   | 0.3                  | -0.31<br>(-0.83,0.21)           | 0.2     | 19.1                   | 0.3                  |
|                        | NSHD             |                       |                                                                      |         |                        |                      |                                 |         |                        |                      |
| Flatter diurnal slope  | CaPS             | 6490                  | -0.07<br>(-0.27,0.14)                                                | 0.5     | 0.0                    | 0.6                  | -0.08<br>(-0.28,0.13)           | 0.5     | 0.0                    | 0.6                  |
|                        | NSHD             |                       |                                                                      |         |                        |                      |                                 |         |                        |                      |
|                        | NCDS             |                       |                                                                      |         |                        |                      |                                 |         |                        |                      |

<sup>a</sup>sex, age at cortisol assessment, follow-up time to wellbeing assessment; <sup>b</sup>Model 1 plus body mass index, smoking status, adult social class; <sup>c</sup>p-values from Cochran's Q statistic performed as a test of between-study heterogeneity

1  
2  
3  
4  
5  
6  
7  
8  
9  
10  
11  
12  
13  
14  
15  
16  
17  
18  
19  
20  
21  
22  
23  
24  
25  
26  
27  
28  
29  
30  
31  
32  
33  
34  
35  
36  
37  
38  
39  
40  
41  
42  
43  
44  
45  
46  
47  
48  
49  
50  
51  
52  
53  
54  
55  
56  
57  
58  
59  
60

Figure 1. Meta-analysis of the association between wellbeing and (A) early morning cortisol; (B) evening cortisol; (C) flatter diurnal slope. All estimates are adjusted for sex and follow-up time.

For peer review only

1  
2  
3  
4  
5  
6  
7  
8  
9  
10  
11  
12  
13  
14  
15  
16  
17  
18  
19  
20  
21  
22  
23  
24  
25  
26  
27  
28  
29  
30  
31  
32  
33  
34  
35  
36  
37  
38  
39  
40  
41  
42  
43  
44  
45  
46  
47  
48  
49  
50  
51  
52  
53  
54  
55  
56  
57  
58  
59  
60

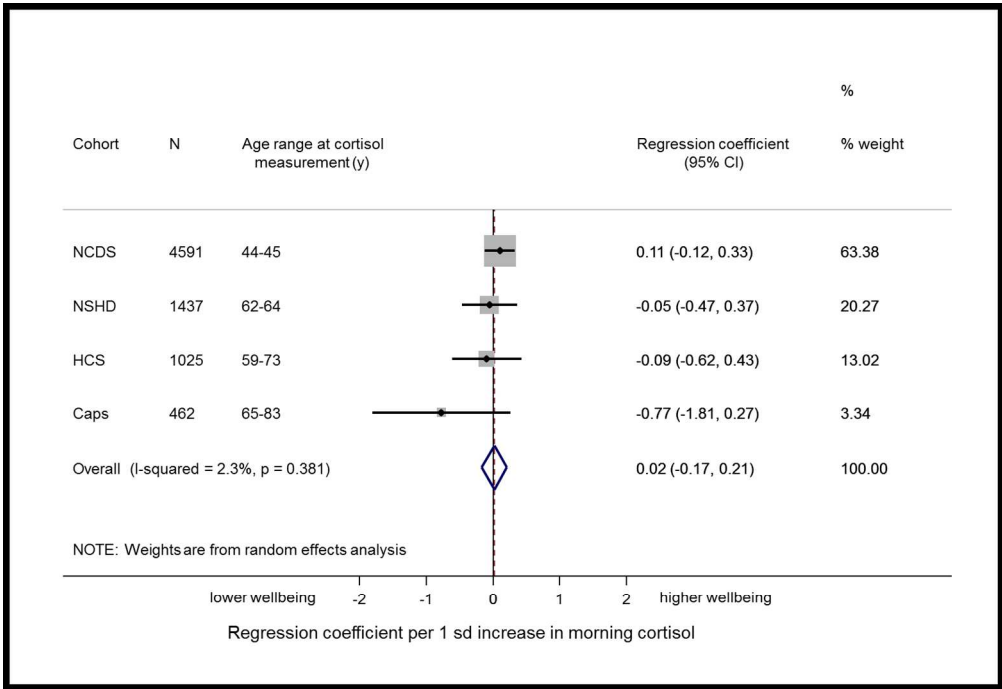

Figure 1A

Review only

1  
2  
3  
4  
5  
6  
7  
8  
9  
10  
11  
12  
13  
14  
15  
16  
17  
18  
19  
20  
21  
22  
23  
24  
25  
26  
27  
28  
29  
30  
31  
32  
33  
34  
35  
36  
37  
38  
39  
40  
41  
42  
43  
44  
45  
46  
47  
48  
49  
50  
51  
52  
53  
54  
55  
56  
57  
58  
59  
60

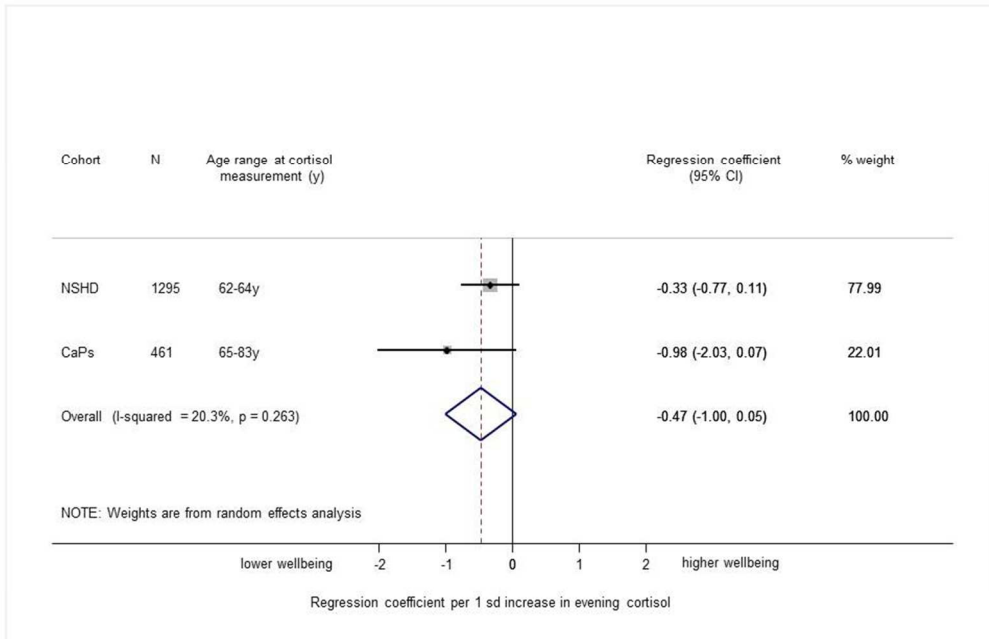

Figure 1B

254x190mm (96 x 96 DPI)

ew only

1  
2  
3  
4  
5  
6  
7  
8  
9  
10  
11  
12  
13  
14  
15  
16  
17  
18  
19  
20  
21  
22  
23  
24  
25  
26  
27  
28  
29  
30  
31  
32  
33  
34  
35  
36  
37  
38  
39  
40  
41  
42  
43  
44  
45  
46  
47  
48  
49  
50  
51  
52  
53  
54  
55  
56  
57  
58  
59  
60

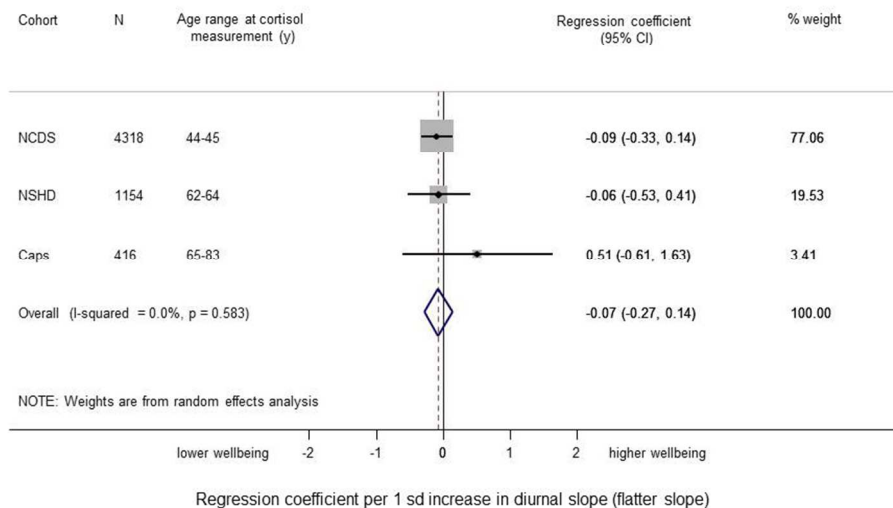

Figure 1C

254x190mm (96 x 96 DPI)

ew only

## STROBE Statement—checklist of items that should be included in reports of observational studies

|                              | <b>Recommendation</b>                                                                                                                                                                | <b>Page</b> |
|------------------------------|--------------------------------------------------------------------------------------------------------------------------------------------------------------------------------------|-------------|
| <b>Title and abstract</b>    | (a) Indicate the study's design with a commonly used term in the title or the abstract                                                                                               | 1,2         |
|                              | (b) Provide in the abstract an informative and balanced summary of what was done and what was found                                                                                  | 1,2         |
| <b>Introduction</b>          |                                                                                                                                                                                      |             |
| Background/rationale         | Explain the scientific background and rationale for the investigation being reported                                                                                                 | 4           |
| Objectives                   | State specific objectives, including any prespecified hypotheses                                                                                                                     | 5           |
| <b>Methods</b>               |                                                                                                                                                                                      |             |
| Study design                 | Present key elements of study design early in the paper                                                                                                                              | 5           |
| Setting                      | Describe the setting, locations, and relevant dates, including periods of recruitment, exposure, follow-up, and data collection                                                      | 5,6         |
| Participants                 | (a) <i>Cohort study</i> —Give the eligibility criteria, and the sources and methods of selection of participants. Describe methods of follow-up                                      | 5,6         |
|                              | (b) <i>Cohort study</i> —For matched studies, give matching criteria and number of exposed and unexposed                                                                             | N/A         |
| Variables                    | Clearly define all outcomes, exposures, predictors, potential confounders, and effect modifiers. Give diagnostic criteria, if applicable                                             | 6-8         |
| Data sources/<br>measurement | For each variable of interest, give sources of data and details of methods of assessment (measurement). Describe comparability of assessment methods if there is more than one group | 5-7         |
| Bias                         | Describe any efforts to address potential sources of bias                                                                                                                            | 10          |
| Study size                   | Explain how the study size was arrived at                                                                                                                                            | 9, Table 1  |
| Quantitative variables       | Explain how quantitative variables were handled in the analyses. If applicable, describe which groupings were chosen and why                                                         | 10          |
| Statistical methods          | (a) Describe all statistical methods, including those used to control for confounding                                                                                                | 10          |
|                              | (b) Describe any methods used to examine subgroups and interactions                                                                                                                  | 10          |
|                              | (c) Explain how missing data were addressed                                                                                                                                          | 10          |
|                              | (d) <i>Cohort study</i> —If applicable, explain how loss to follow-up was addressed                                                                                                  | 10-11       |
|                              | (e) Describe any sensitivity analyses                                                                                                                                                | 10-11       |

Continued on next page

| <b>Results</b>           |                                                                                                                                                                                                              | <b>Page</b> |
|--------------------------|--------------------------------------------------------------------------------------------------------------------------------------------------------------------------------------------------------------|-------------|
| Participants             | (a) Report numbers of individuals at each stage of study—eg numbers potentially eligible, examined for eligibility, confirmed eligible, included in the study, completing follow-up, and analysed            | 9, Table 1  |
|                          | (b) Give reasons for non-participation at each stage                                                                                                                                                         |             |
|                          | (c) Consider use of a flow diagram                                                                                                                                                                           | N/A         |
| Descriptive data         | (a) Give characteristics of study participants (eg demographic, clinical, social) and information on exposures and potential confounders                                                                     | Table 1     |
|                          | (b) Indicate number of participants with missing data for each variable of interest                                                                                                                          |             |
|                          | (c) <i>Cohort study</i> —Summarise follow-up time (eg, average and total amount)                                                                                                                             |             |
| Outcome data             | <i>Cohort study</i> —Report numbers of outcome events or summary measures over time                                                                                                                          | Table 1     |
| Main results             | (a) Give unadjusted estimates and, if applicable, confounder-adjusted estimates and their precision (eg, 95% confidence interval). Make clear which confounders were adjusted for and why they were included | Table 2     |
|                          | (b) Report category boundaries when continuous variables were categorized                                                                                                                                    |             |
|                          | (c) If relevant, consider translating estimates of relative risk into absolute risk for a meaningful time period                                                                                             |             |
| Other analyses           | Report other analyses done—eg analyses of subgroups and interactions, and sensitivity analyses                                                                                                               | 12          |
| <b>Discussion</b>        |                                                                                                                                                                                                              |             |
| Key results              | Summarise key results with reference to study objectives                                                                                                                                                     | 13          |
| Limitations              | Discuss limitations of the study, taking into account sources of potential bias or imprecision. Discuss both direction and magnitude of any potential bias                                                   | 14          |
| Interpretation           | Give a cautious overall interpretation of results considering objectives, limitations, multiplicity of analyses, results from similar studies, and other relevant evidence                                   | 13-14       |
| Generalisability         | Discuss the generalisability (external validity) of the study results                                                                                                                                        | 13          |
| <b>Other information</b> |                                                                                                                                                                                                              |             |
| Funding                  | Give the source of funding and the role of the funders for the present study and, if applicable, for the original study on which the present article is based                                                | 24          |



# BMJ Open

## Diurnal cortisol and mental wellbeing in middle and older age: evidence from four cohort studies

|                                 |                                                                                                                                                                                                                                                                                                                                                                                                                                                                                                                                                                                                                                                                                                                                                                                         |
|---------------------------------|-----------------------------------------------------------------------------------------------------------------------------------------------------------------------------------------------------------------------------------------------------------------------------------------------------------------------------------------------------------------------------------------------------------------------------------------------------------------------------------------------------------------------------------------------------------------------------------------------------------------------------------------------------------------------------------------------------------------------------------------------------------------------------------------|
| Journal:                        | <i>BMJ Open</i>                                                                                                                                                                                                                                                                                                                                                                                                                                                                                                                                                                                                                                                                                                                                                                         |
| Manuscript ID                   | bmjopen-2017-016085.R1                                                                                                                                                                                                                                                                                                                                                                                                                                                                                                                                                                                                                                                                                                                                                                  |
| Article Type:                   | Research                                                                                                                                                                                                                                                                                                                                                                                                                                                                                                                                                                                                                                                                                                                                                                                |
| Date Submitted by the Author:   | 09-May-2017                                                                                                                                                                                                                                                                                                                                                                                                                                                                                                                                                                                                                                                                                                                                                                             |
| Complete List of Authors:       | Stafford, Mai; University College London, MRC Unit for Lifelong Health and Ageing<br>Ben-Shlomo, Yoav; University of Bristol,<br>Cooper, Cyrus; University of Southampton and Southampton University Hospitals NHS Trust, MRC Lifecourse Epidemiology Unit<br>Gale, Catharine; MRC Epidemiology Resource Centre; University of Edinburgh, Department of Psychology<br>Gardner, Mike; University of Oxford, Nuffield Department of Population Health<br>Geoffroy, Marie-Claude; McGill University, McGill Group for Suicide Studies at Douglas Mental Health University Institute; McGill University, Department of Psychiatry<br>Power, Christine<br>Kuh, Diana; MRC Unit for Lifelong Health and Ageing at UCL,<br>Cooper, Rachel; UCL, MRC Unit for Lifelong Health and Ageing at UCL |
| <b>Primary Subject Heading</b>: | Epidemiology                                                                                                                                                                                                                                                                                                                                                                                                                                                                                                                                                                                                                                                                                                                                                                            |
| Secondary Subject Heading:      | Mental health                                                                                                                                                                                                                                                                                                                                                                                                                                                                                                                                                                                                                                                                                                                                                                           |
| Keywords:                       | meta-analysis, individual participant data, positive psychology                                                                                                                                                                                                                                                                                                                                                                                                                                                                                                                                                                                                                                                                                                                         |
|                                 |                                                                                                                                                                                                                                                                                                                                                                                                                                                                                                                                                                                                                                                                                                                                                                                         |

SCHOLARONE™  
Manuscripts

1  
2  
3 **Diurnal cortisol and mental wellbeing in middle and older age: evidence from four cohort**  
4 **studies**  
5  
6  
7

8 Authors information  
9

10 Mai Stafford<sup>1</sup>, Yoav Ben-Shlomo<sup>2</sup>, Cyrus Cooper<sup>3</sup>, Catharine Gale<sup>3,4</sup>, Michael P. Gardner<sup>5</sup>,  
11 Marie-Claude Geoffroy<sup>6</sup>, Chris Power<sup>7</sup>, Diana Kuh<sup>1</sup>, Rachel Cooper<sup>1</sup>  
12  
13

14  
15 <sup>1</sup>MRC Unit for Lifelong Health and Ageing at UCL, UCL, London, UK  
16

17 <sup>2</sup>School of Social and Community Medicine, University of Bristol, Bristol, UK  
18

19 <sup>3</sup>MRC Lifecourse Epidemiology Unit, University of Southampton, Southampton, UK  
20

21 <sup>4</sup>Department of Psychology, University of Edinburgh, Edinburgh, UK  
22

23 <sup>5</sup>Nuffield Department of Population Health, University of Oxford, Oxford, UK  
24

25 <sup>6</sup>McGill Group for Suicide Studies at Douglas Mental Health University Institute; and  
26 Department of Psychiatry, McGill University, Montréal, Canada  
27

28 <sup>7</sup>Population, Policy and Practice Programme, UCL Great Ormond Street Institute of Child  
29 Health, UCL, London, UK  
30  
31

32  
33 Correspondence to: Dr Mai Stafford, MRC Unit for Lifelong Health and Ageing at UCL, 33  
34 Bedford Place, London, WC1B 5JU; email: [m.stafford@ucl.ac.uk](mailto:m.stafford@ucl.ac.uk); tel: +44 207 570 5712  
35  
36  
37

38  
39 Word count: 3313  
40

41 Number of figures and tables: 3 figures, 2 tables  
42  
43  
44  
45  
46  
47  
48  
49  
50  
51  
52  
53  
54  
55  
56  
57  
58  
59  
60

1  
2  
3  
4  
5 **Diurnal cortisol and mental wellbeing in middle and older age: evidence from four cohort**  
6 **studies**  
7  
8  
9

10 ABSTRACT

11 Objectives: We conducted individual participant meta-analysis to test the hypothesis that  
12 cortisol patterns indicative of dysregulated HPA-axis functioning would be prospectively  
13 associated with poorer wellbeing at follow-up.  
14

15 Setting: Four large UK-based cohort studies  
16

17 Participants: Those providing valid salivary or serum cortisol samples (n=7515 for morning  
18 cortisol; n=1756 for evening cortisol) at baseline (age 44-82) and wellbeing data on the  
19 Warwick Edinburgh Mental Wellbeing Scale at follow-up (0-8 years) were included.  
20

21 Results: Wellbeing was not associated with morning cortisol or diurnal slope though a  
22 borderline association with evening cortisol was found. Adjusting for sex and follow-up time,  
23 each 1 standard deviation increase in evening cortisol was associated with a -0.47 (95% CI -  
24 1.00, 0.05) point lower WEMWBS. This was attenuated by adjustment for body mass index,  
25 smoking and socioeconomic position. Between-study heterogeneity was low.  
26

27 Conclusions: This study does not support the hypothesis that diurnal cortisol is prospectively  
28 associated with wellbeing up to 8 years later. However, replication in prospective studies with  
29 cortisol samples over multiple days is required.  
30

31  
32  
33  
34  
35  
36  
37  
38  
39  
40  
41  
42  
43  
44  
45  
46  
47  
48  
49  
50  
51  
52  
53  
54  
55  
56  
57  
58  
59  
60  
Keywords: meta-analysis; individual participant data; positive psychology;

1  
2  
3  
4  
5 Strengths  
6  
7

- 8 • Individual participant meta-analysis based on 1612-7515 participants with cortisol  
9 data  
10
- 11 • Prospective study with up to 8 years of follow-up  
12
- 13 • Validated mental wellbeing instrument based on 14 items capturing hedonic and  
14 eudaimonic components harmonized across cohorts  
15  
16  
17  
18  
19  
20

21 Limitations  
22  
23

- 24 • Salivary cortisol samples taken over 1 or 2 days; up to a maximum of 4 times per day  
25
- 26 • Actual waking time was not recorded in all studies  
27  
28  
29  
30  
31  
32  
33  
34  
35  
36  
37  
38  
39  
40  
41  
42  
43  
44  
45  
46  
47  
48  
49  
50  
51  
52  
53  
54  
55  
56  
57  
58  
59  
60

## INTRODUCTION

Cortisol is a marker of hypothalamic-pituitary-adrenal (HPA) axis functioning and follows a diurnal rhythm. Large-scale epidemiological studies have measured salivary cortisol sampled several times during the course of a day to capture its rising levels during the awakening response and the subsequent decline across the day. The mental health and wellbeing consequences of raised cortisol levels are of interest particularly among older people given that some studies find they have higher evening cortisol levels[1] and greater total cortisol output throughout the day[2] compared with younger people though there is inter-individual variation in age-related change in cortisol [3] and this may reflect age-related change in disease rather than normal ageing [4].

Positive mental wellbeing is a multidimensional concept that captures hedonic (e.g. happiness and experiencing pleasure) and eudemonic (e.g. self-realization and psychologically functioning at potential) aspects of mental health that are distinct from depressive illness.[5] Cortisol may be linked to a positive psychological state through its effect on mood-altering neurotransmitters including serotonin.[6] Cortisol also has energy-mobilising properties that may in turn promote mental wellbeing.[7]

Two studies of healthy older people found no association between cortisol levels and positive wellbeing (captured by the positive items of the General Health Questionnaire[8] or by daily positive emotions[9]). A study of women aged 65 and over found that greater eudaimonic wellbeing was associated with flatter cortisol slope over the day, though this was due to lower morning cortisol levels which remained low across the day.[10] All studies were small (less than 200 participants). In younger adults (i.e. 55 years and younger), some studies

1  
2  
3 have found that greater positive affect or happiness was associated with lower total cortisol  
4  
5 output[11-14] but others have not.[15,16] These studies have not examined prospective  
6  
7 associations between baseline cortisol patterns and wellbeing at follow-up in large,  
8  
9 population-based samples. Although stressors are typically associated with HPA axis  
10  
11 activation and decreases in vagal tone, some studies suggest that there may in some cases be  
12  
13 a subsequent response involving the dorso-vagal parasympathetic system and down-  
14  
15 regulation of the HPA axis resulting in low cortisol levels [17]. If this is the case then a long-  
16  
17 term inverse association between cortisol and wellbeing may not be evident.  
18  
19  
20

21  
22 The aim of the current study was to draw on individual participant data from four  
23  
24 large British cohort studies using meta-analysis to examine the longitudinal associations  
25  
26 between diurnal cortisol and positive mental wellbeing captured by an instrument which  
27  
28 summarizes positive thoughts and feelings from both hedonic and eudemonic perspectives.  
29  
30 We hypothesized that cortisol patterns indicative of disrupted HPA axis functioning (i.e. lower  
31  
32 early morning levels, higher evening levels and less steep decline (i.e. flatter response) across  
33  
34 the day) would be associated with lower wellbeing at follow-up.  
35  
36  
37  
38  
39  
40  
41  
42

## 43 METHODS

### 44 ***Cohort studies***

45  
46 We used the four cohort studies from the Healthy Ageing across the Life Course (HALCyon)  
47  
48 cross cohort research programme[18] with data on both cortisol and Warwick Edinburgh  
49  
50 Mental Wellbeing Scale: the Caerphilly Prospective Study (CaPS)[19]; the Hertfordshire Cohort  
51  
52 Study (HCS)[20]; the MRC National Survey of Health and Development (NSHD)[21]; and the  
53  
54  
55  
56  
57  
58  
59  
60

1  
2  
3 National Child Development Study (NCDS).[22] All studies received appropriate ethical  
4 approval.[19-22]  
5  
6  
7

8  
9  
10 *Caerphilly Prospective Study (CaPS)*

11  
12 CaPS is a cohort of men who were recruited when they were aged 45–59 years, between 1979  
13 and 1983, from the town of Caerphilly and adjacent villages in South Wales. In the second  
14 wave (1984 – 1988) the original cohort was supplemented with men of a similar age who had  
15 moved into the defined area. Salivary cortisol was assessed at phase 5 of data collection in  
16 2000–2004 when participants were aged 65 to 82 years and wellbeing was assessed in 2011  
17 when they were aged 73 to 90 years.  
18  
19  
20  
21  
22  
23  
24  
25  
26  
27

28  
29 *Hertfordshire Cohort Study (HCS)*

30  
31 HCS is a cohort of men and women born in East, North or West Hertfordshire between 1931  
32 and 1939 whose birth and infant records were available and who were alive and still living in  
33 Hertfordshire in the 1990s. Cortisol was assessed at wave 1 of the data collection (1999–  
34 2004) when participants were aged 60 – 73 years and wellbeing was assessed in 2008 when  
35 they were aged 69 – 78.  
36  
37  
38  
39  
40  
41  
42  
43  
44  
45

46 *The MRC National Survey of Health and Development (NSHD)*

47  
48 NSHD is a nationally representative sample of people born in England, Scotland, and Wales  
49 during one week in March 1946 followed prospectively since birth. Cortisol and wellbeing  
50 data were collected in 2008-10 when cohort members were aged 62-64 years.  
51  
52  
53  
54  
55

56  
57 *The National Child Development Study (NCDS)*  
58  
59  
60

1  
2  
3 NCDS is a nationally representative sample of people born in England, Scotland, and Wales  
4  
5 during 1 week in March 1958 followed prospectively since birth. Cortisol was assessed as part  
6  
7 of a bio-medical survey (2002–2004) when cohort members were aged 44-45 and wellbeing  
8  
9 was assessed at a follow-up (2008-2009) at mean age of 50.7.  
10  
11

### 12 13 14 15 ***Cortisol***

16  
17 All study members who had not withdrawn or been lost to follow-up at the relevant sweep  
18  
19 were invited to participate in the cortisol sampling. In HCS, one fasting morning serum cortisol  
20  
21 sample was taken from each participant at a research clinic between 8.30 and 9.30 AM,  
22  
23 frozen and subsequently measured by radioimmunoassay. Salivary cortisol samples were  
24  
25 collected in CaPS, NSHD and NCDS at multiple times across the day with participants shown  
26  
27 how to collect saliva using plain cotton wool swabs (salivettes) at home. Subjects were asked  
28  
29 to chew on the salivettes for 1-2 min and a saliva sample was obtained. In CaPS, participants  
30  
31 were requested to take samples on waking, 30 minutes later, at 2 pm and 10 pm on two  
32  
33 consecutive days. In NSHD, samples were taken on waking, 30 minutes later and at 9 pm.  
34  
35 Samples in NCDS were taken in the first 45 minutes after waking and 3 hours later. Samples  
36  
37 from CaPS, NSHD and NCDS were frozen and subsequently assayed by radioimmunoassay  
38  
39 done at the University of Dresden which specializes in high through-put cortisol assays.[23]  
40  
41  
42  
43  
44  
45  
46  
47

### 48 ***Mental wellbeing***

49  
50 Positive mental wellbeing was assessed using the Warwick Edinburgh Mental Wellbeing Scale  
51  
52 (WEMWBS) in all four studies. This self-completion scale captures positive affect, satisfying  
53  
54 interpersonal relationships and positive functioning. Items are worded positively and  
55  
56 respondents are asked to indicate how frequently, on a five point scale, they have  
57  
58  
59  
60



1  
2  
3 experienced each statement over the last two weeks. Statements include “I’ve been feeling  
4  
5 good about myself”, “I’ve been feeling close to other people”, “I’ve been interested in new  
6  
7 things” and “I’ve been feeling optimistic about the future”. Scores theoretically range from 14  
8  
9 to 70 with 70 indicating highest wellbeing. Where three or fewer items were missing, values  
10  
11 were imputed based on the average score for completed items (CaPS n=43; HCS n=52; NSHD  
12  
13 n=84; NCDS n=103). Internal consistency of the scale in all four cohorts was high (Cronbach  
14  
15 alpha=0.91 in HCS, NSHD and NCDS and 0.93 in CaPS.[24] Validation work indicates good  
16  
17 construct validity for a single factor structure as well as good criterion validity and test-retest  
18  
19 reliability and supports its use in general population samples.[25]  
20  
21  
22  
23  
24  
25

### 26 **Covariates**

27  
28 Key covariates that might confound the association between cortisol and wellbeing and which  
29  
30 had been assessed in each of the cohorts were chosen *a priori*: sex, age at cortisol  
31  
32 measurement, follow-up time to measurement of wellbeing, body mass index (BMI), smoking,  
33  
34 and adult socio-economic position.[26-28] The covariates were measured at the same wave  
35  
36 as cortisol samples unless otherwise stated. BMI was calculated as measured weight divided  
37  
38 by the square of height and was categorized into quartiles when there was evidence of  
39  
40 deviation from linearity in the association with wellbeing (NSHD, NCDS). Smoking was  
41  
42 reported by participants and dichotomized into current smoker vs ex- and never smoker  
43  
44 (NCDS smoking data at age 42 years). Adult socioeconomic position was derived from own  
45  
46 occupational class (CaPS at age 47-67, HCS at age 60-73, NSHD at age 53 or earlier if missing,  
47  
48 NCDS at age 42) and grouped as manual or non-manual occupation (the latter indicating  
49  
50 greater socioeconomic advantage).  
51  
52  
53  
54  
55  
56  
57  
58  
59  
60

### ***Initial treatment of the data and standardization***

Cortisol has a marked circadian rhythm and therefore the time of day at which it is sampled will affect its level. In CaPS, NSHD and NCDS actual times when the salivary samples were taken were recorded by participants. Observed values were adjusted for the time of sampling by fitting a linear or polynomial function to the association between cortisol and time of measurement and adding the resulting residuals from the best fit model to the overall mean cortisol value. This gives the estimated cortisol level at the time specified in the protocol for each participant. Morning cortisol (salivary or serum) levels were available in all four cohorts (CaPS, HCS, NSHD and NCDS) and night time values in CaPS and NSHD. For NCDS, the later cortisol measure was taken 3 hours after the morning measure on the same day (around 11.15AM) and there was no evening measure. However past publications support the notion that the diurnal decline over this shorter period is a good surrogate for the decline from morning till night[29] and hence this measure was used to derive a measure of diurnal slope. HCS collected serum cortisol, the levels of which are around 20 times higher than the free cortisol concentrations found in saliva. However, a study on the relationship between serum and salivary cortisol in healthy individuals[30] showed that correlations were high whether taken at the same time ( $>0.90$ ) or 70 minutes apart (0.54—0.94). Those participants who reported taking cortico-steroid medication were excluded from the analysis sample (CaPS  $n=62$ ; HCS  $n=13$ ; NSHD  $n=19$ ). In NCDS, participants were excluded from analysis if they reported taking endocrine system medication ( $n= 396$ ). Outlying salivary cortisol values greater than 100 nmol/L were removed (CaPS  $n=5$ ; NSHD  $n=7$ ; NCDS  $n=21$ ), since high cortisol values can have substantial statistical influence on estimates and it is unclear what these high values represent.[31] Morning salivary cortisol values that were not between 5am and noon were removed and evening values if they were before 8pm, since these participants with

1  
2  
3 atypical sleeping hours may have substantially different cortisol profiles. In CaPS, cortisol  
4  
5 values were averaged over the same measures obtained on two consecutive days. Early  
6  
7 morning salivary cortisol was computed in CaPS and NSHD as the mean of waking and 30 min  
8  
9 samples; to be comparable, in NCDS the cortisol measure taken within 45 minutes after  
10  
11 waking was used. In HCS morning serum cortisol was used.  
12  
13

14  
15  
16  
17 To be able to combine the cohorts in a meta-analysis, the cortisol values were standardized  
18  
19 by deriving study-specific z-scores. In NCDS, both early and late morning cortisol were  
20  
21 positively skewed, as was night time cortisol in CaPS and NSHD, so values were  $\log_e$   
22  
23 transformed before they were converted to z-scores. In addition to the early morning and  
24  
25 night time cortisol measures, we derived the diurnal slope (CaPS, NSHD, NCDS) as early  
26  
27 morning value subtracted from the evening (or late morning in NCDS) value and divided by  
28  
29 the lapsed time period. The overall slope is negative and so positive z-scores indicate a flatter  
30  
31 response.  
32  
33  
34  
35  
36  
37

### 38 **Statistical Methods**

39  
40 A two stage meta-analysis was performed. In the first stage, we modelled WEMWBS as a  
41  
42 function of each diurnal cortisol indicator in turn using linear regression in each cohort  
43  
44 separately, with adjustment for i) sex, age at cortisol measurement and follow-up time to the  
45  
46 wellbeing measurement, ii) additional adjustment for BMI, smoking status and  
47  
48 socioeconomic position. There was no evidence of deviation from linearity in the association  
49  
50 between any of the cortisol measures and WEMWBS. There was no evidence of interaction  
51  
52 between sex and any of the cortisol measures. In sensitivity analysis to explore possible bias  
53  
54 arising from missing covariates, we adjusted for sex and age at cortisol and follow-up time i)  
55  
56  
57  
58  
59  
60

1  
2  
3 using the maximum available sample with cortisol and wellbeing data (results not presented),  
4  
5 ii) using the sample restricted to only those participants that had complete data on all  
6  
7 covariates. Results did not materially differ for these two samples. In the second stage,  
8  
9 cohort-specific estimates were pooled in random-effects meta-analyses[32] chosen a priori  
10  
11 due to the expected heterogeneity between the different studies.  
12  
13

#### 14 15 16 17 Sensitivity analyses

18  
19 We corrected regression estimates for regression dilution bias arising from error in the  
20  
21 measurement of cortisol. The reliability ratios were estimated by regressing the cortisol  
22  
23 measure on day 2 on the measure on day 1 from CaPS data.[33] This yielded reliability ratios  
24  
25 of 0.554, 0.349 and 0.430 for morning, evening and slope cortisol respectively.  
26  
27  
28  
29  
30

#### 31 RESULTS

32  
33 The characteristics of the participants of the four cohorts in the analysis are shown in Table 1.  
34  
35 Age at time of wellbeing measurement ranged from mean (sd) age of 50.7 (0.1) years in NCDS  
36  
37 to 80.1 (3.9) years in CaPS. Mean wellbeing ranged from 49.5 (7.9) in NCDS to 53.3 (10.6) in  
38  
39 CaPS and increased with mean age of the cohort. Mean early morning cortisol values were  
40  
41 similar for the three cohorts (CaPS, NSHD, NCDS) that had measured salivary cortisol. Night  
42  
43 time cortisol values were also similar although diurnal slope was more negative (indicating  
44  
45 greater decline) in NCDS than in NSHD and CaPS.  
46  
47  
48  
49  
50

51  
52 We found no evidence of an association between early morning cortisol and wellbeing in the  
53  
54 individual cohorts in sex, age and follow-up time adjusted models. The overall pooled estimate  
55  
56 was 0.02 (95% CI -0.17,0.21; p=0.8) and there was no evidence of heterogeneity in this  
57  
58  
59  
60

1  
2  
3 association across studies ( $I^2=2.3$ ;  $p$  for heterogeneity=0.4) (Table 2 and Figure 1A). Further  
4  
5 adjustment for all covariates did not affect the overall pooled estimate 0.01 (95% CI -0.22,0.24;  
6  
7  $I^2=18.0$ ;  $p$  for heterogeneity=0.3).  
8  
9

10  
11  
12 Sex, age and follow-up time adjusted associations between evening cortisol and wellbeing in  
13  
14 the individual cohorts were in the expected direction (i.e. higher evening cortisol was  
15  
16 associated with lower wellbeing) in NSHD: -0.33 (95% CI -0.77,0.11); CaPS -0.98 (95% CI -  
17  
18 2.03,0.07). This indicates a weak inverse association between evening cortisol and wellbeing  
19  
20 (Table 2 and Figure 1B). Adjustment for BMI, smoking and social class attenuated this  
21  
22 association. Again, there was no evidence of heterogeneity across studies ( $I^2=19.1$ ;  $p$  for  
23  
24 heterogeneity =0.3).  
25  
26  
27  
28  
29

30  
31 In the pooled analysis a flatter diurnal slope was associated with poorer wellbeing though this  
32  
33 was not statistically significant before or after adjustment for all covariates (Table 2 and Figure  
34  
35 1C). Results excluding NCDS (based on decline in cortisol between early and late morning) were  
36  
37 similar (0.02 (95% CI -0.41, 0.46)).  
38  
39  
40  
41  
42

43 In sensitivity analysis, correcting for regression dilution bias, the sex, age and follow-up time  
44  
45 adjusted associations between cortisol and wellbeing were 0.036, -1.347 and -0.163 for  
46  
47 morning, evening and slope cortisol respectively.  
48  
49  
50

## 51 52 DISCUSSION

53  
54  
55 Based on meta-analysis of individual participant data from four large cohort studies,  
56  
57 we found that morning cortisol and diurnal slope were not associated with wellbeing but  
58  
59  
60

1  
2  
3 there was evidence that higher evening cortisol was prospectively associated with lower  
4  
5 positive mental wellbeing in middle and older age. The magnitude of this association was  
6  
7 small (-0.06 standard deviations in wellbeing) in crude analysis though up to -0.17 standard  
8  
9 deviations in wellbeing accounting for possible regression dilution bias. This association was  
10  
11 attenuated by the inclusion of BMI, smoking and socioeconomic position. It remains unclear  
12  
13 whether obesity is secondary to HPA axis dysregulation so this may represent over-  
14  
15 adjustment for a variable on the explanatory pathway. Perceived stress is also linked to lower  
16  
17 socioeconomic position, smoking and cortisol levels [27, 30] and so isolating an association  
18  
19 between cortisol and wellbeing independently of these factors needs to be interpreted with  
20  
21 caution.  
22  
23  
24  
25

26  
27 Evening cortisol is arguably the least affected by salivary sampling protocol deviations,  
28  
29 which can bias associations between cortisol and wellbeing towards the null.[7] Furthermore,  
30  
31 single-day sampling tends to bias cortisol estimates towards state rather than trait values,[31]  
32  
33 which may also explain the lack of association with wellbeing up to eight years later. Only one  
34  
35 of the included studies captured cortisol profiles on more than one day and this study only on  
36  
37 two days. We examined inter-individual differences in cortisol in relation to wellbeing up to  
38  
39 eight years after assessment of cortisol patterns. It is possible that an association between  
40  
41 cortisol and wellbeing would only be evident over a shorter lag time. When measured on the  
42  
43 same day, studies have found higher positive affect among those with lower cortisol  
44  
45 output.[14,34,35] In addition, lower output in the first 45 minutes after waking[8] and total  
46  
47 output across the day[10] has been associated with higher wellbeing over a period of 3-4  
48  
49 weeks. Where intensive study designs have been used to measure intra-individual change  
50  
51 based on serial measurements of both cortisol and wellbeing repeated over multiple days,  
52  
53 some studies find evidence of an inverse association between cortisol output and positive  
54  
55  
56  
57  
58  
59  
60

1  
2  
3 affect[11,13,36-38] though others do not.[9,15,16] Trait positive affect has been found to  
4  
5 predict higher evening cortisol (in men only)[39] though we are not aware that a prospective  
6  
7 association between baseline cortisol and subsequent mental wellbeing has been assessed.  
8  
9  
10 Future studies are warranted in order to examine the longitudinal association between  
11  
12 mental wellbeing and cortisol sampled over multiple days to more accurately capture trait  
13  
14 cortisol. In addition, cortisol samples taken at regular intervals throughout follow-up would  
15  
16 enable us to identify how changes in HPA-axis activation, such as hypocortisolism as a  
17  
18 response to chronic stress, might be related to mental wellbeing.  
19  
20

21  
22       Though the evidence remains inconsistent at present, explanatory pathways include  
23  
24 the over-activation of the HPA axis which interacts with the serotonin system and may  
25  
26 ultimately result in serotonin depletion, increasing proneness to negative emotional states  
27  
28 and reducing positive emotionality.[6,40,41] In addition, it has been proposed that the  
29  
30 energy-mobilising properties of cortisol may underlie an association with positive mental  
31  
32 wellbeing and that this pathway may be less relevant for understanding an association  
33  
34 between cortisol and mental ill health.[7] The evidence base is currently too limited to  
35  
36 determine whether diurnal cortisol is related to different components of positive mental  
37  
38 wellbeing and to negative mental health in the same way though there is some indication that  
39  
40 wellbeing and illbeing do not show the same correlations with cortisol slope.[10] The current  
41  
42 study used the Warwick Edinburgh Mental Wellbeing Scale, designed to capture both hedonic  
43  
44 and eudemonic wellbeing over the last two weeks. Future research might explore a wider set  
45  
46 of hedonic and eudemonic components of mental wellbeing, as well as measures of mental ill  
47  
48 health, in a single analytical sample to establish whether they show the same or different  
49  
50 relationships with diurnal cortisol.  
51  
52  
53  
54  
55  
56  
57  
58  
59  
60

1  
2  
3 Other limitations should be acknowledged. There were differences in the protocol for  
4  
5 the collection of cortisol although we did not find evidence of between-study heterogeneity in  
6  
7 the estimates from the meta-analysis (with all  $I^2$  values below 21%). We used clock time but  
8  
9 cortisol patterns are more closely anchored to waking time. Participants were instructed to  
10  
11 provide samples at specified times post-waking but actual waking time was not recorded. In  
12  
13 addition, a maximum of four samples per day were collected and additional measures may  
14  
15 have provided more accurate assessment of diurnal cortisol, especially diurnal slope. We did  
16  
17 not consider factors that may modify the prospective association between cortisol and  
18  
19 wellbeing, such as social support which has been shown to buffer the health impact of  
20  
21 stress.[42]  
22  
23  
24  
25

26  
27 Nevertheless, the current study also has strengths. It includes a large number of  
28  
29 participants (ranging from 1756 to 7515 in each analysis and considerably larger than any  
30  
31 previous study), in population-based samples, using harmonized measures of wellbeing and  
32  
33 covariates. Individual participant data meta-analysis was used, which has advantages over  
34  
35 aggregate meta-analysis including greater statistical power and standardization of the  
36  
37 derivation of variables and analytical models.[43]  
38  
39  
40

41 In summary, the findings from this meta-analysis do not provide support for the  
42  
43 hypothesis that cortisol profiles indicative of disrupted HPA axis functioning has strong  
44  
45 associations positive mental wellbeing in healthy middle-aged and older people. Of the three  
46  
47 diurnal cortisol levels considered here, only evening cortisol showed a prospective association  
48  
49 with wellbeing and only in minimally-adjusted analysis. However, cortisol was sampled on  
50  
51 only one or two days and studies with samples across multiple days may find stronger  
52  
53 associations if they better characterize cortisol patterns, though it is likely that any  
54  
55 associations, if found, will be of modest to moderate magnitude.  
56  
57  
58  
59  
60



**Contributor statement:**

YBS, CC, CG, CP and DK conceptualised the study. MS, YBS, MG, MCG and RC identified the variables, cleaned the data and undertook data analysis. All authors contributed to reviewing and interpreting the results, commenting on the manuscript and approved the final version.

**Competing interests:**

Authors have no conflicts of interest to report.

**Funding:**

MS, RC and DK are supported by the UK Medical Research Council (Programme codes MRC\_MC\_UU\_12019/1; MRC\_MC\_UU\_12019/4; MRC\_MC\_UU\_12019/5). The MRC National Survey of Health and Development is funded by the UK Medical Research Council.

HALCyon was funded by the New Dynamics of Ageing (RES-353-25-0001) and MG was supported by this grant.

Data collection of cortisol in NCDS at 45 years was funded by the United Kingdom Medical Research Council, grant G0000934. This research was supported by the National Institute for Health Research Biomedical Research Centre at Great Ormond Street Hospital for Children NHS Foundation Trust and University College London.

The funders had no role in the study design, data collection, data analysis, data interpretation, writing of the report or the decision to submit the article for publication.

**Data sharing statement:**

MRC National Survey of Health and Development data used in this publication are available to bona fide researchers upon request to the NSHD Data Sharing Committee via a standard application procedure. Further details can be found at <http://www.nshd.mrc.ac.uk/data>. doi: 10.5522/NSHD/Q101; doi:10.5522/NSHD/Q102.

All requests for collaboration on the Caerphilly Prospective Study are reviewed by an independent steering committee (<http://www.bris.ac.uk/social-community-medicine/projects/caerphilly/collaboration/>).

National Child Development Study data are available via registration with the UK Data Service.

The Hertfordshire Cohort Study has governance and access arrangements that comply with MRC data sharing policy. The survey data are accessible to bona fide researchers by contacting Professor Cyrus Cooper, Director of the MRC Lifecourse Epidemiology Unit at the University of Southampton, who can forward a collaborators' agreement.

**Acknowledgements:**

The authors thank Stephanie Black for her contribution to data collation, statistical analysis and interpretation of the results presented here.

1  
2  
3  
4  
5  
6  
7  
8  
9  
10  
11  
12  
13  
14  
15  
16  
17  
18  
19  
20  
21  
22  
23  
24  
25  
26  
27  
28  
29  
30  
31  
32  
33  
34  
35  
36  
37  
38  
39  
40  
41  
42  
43  
44  
45  
46  
47  
48  
49  
50  
51  
52  
53  
54  
55  
56  
57  
58  
59  
60

The authors are grateful to the Centre for Longitudinal Studies (CLS), UCL Institute of Education for the use of these data and to the UK Data Service for making them available. However, neither CLS nor the UK Data Service bear any responsibility for the analysis or interpretation of these data.

For peer review only

## REFERENCES

1. Herbert J, Goodyer IM, Grossman, AB, et al, Do corticosteroids damage the brain? *J Neuroendocrinol* 2006;18:393-411.
2. Kumari M, Badrick E, Sacker A, et al. 2010a. Identifying patterns in cortisol secretion in an older population. Findings from the Whitehall II study. *Psychoneuroendocrinology* 2010;35:1091-9.
3. Lupien S, Lecours AR, Schwartz G, et al. Longitudinal study of basal cortisol levels in healthy elderly subjects: evidence for subgroups. *Neurobiol Aging* 1996;17:95–105.
4. Souza-Talarico, J. N. D., Marin, M. F., Sindi, S., & Lupien, S. J. (2011). Effects of stress hormones on the brain and cognition: evidence from normal to pathological aging. *Dementia & Neuropsychologia*, 5(1), 8-16.
5. Huppert FA, Whittington JE. Evidence for the independence of positive and negative well-being: implications for quality of life assessment. *Br J Health Psychol* 2003;8:107-22.
6. Braquehais MD, Picouto MD, Casas M, et al. Sher, L., 2012. Hypothalamic-pituitary-adrenal axis dysfunction as a neurobiological correlate of emotion dysregulation in adolescent suicide. *World J. Pediatr.* 8, 197-206.
7. Smyth N, Thorn L, Hucklebridge F, et al. Post awakening salivary cortisol secretion and trait well-being: The importance of sample timing accuracy. *Psychoneuroendocrinology* 2015;58:141-51.
8. Evans P, Forte D, Jacobs C, et al. Cortisol secretory activity in older people in relation to positive and negative well-being. *Psychoneuroendocrinology* 2007;32:922-930.

- 1  
2  
3 9. Adam EK, Hawkey LC, Kudielka BM, et al. Day-to-day dynamics of experience – cortisol  
4 associations in a population-based sample of older adults. *Proc Natl Acad Sci USA*  
5 2006;103:17058-63.  
6  
7  
8  
9  
10 10. Ryff CD, Love GD, Urry HL, et al. Psychological well-being and ill-being: do they have  
11 distinct or mirrored biological correlates? *Psychother Psychosom* 2006;75:85–95.  
12  
13  
14  
15 11. Smyth J, Ockenfels MC, Porter L, et al. Stressors and mood measured on a momentary  
16 basis are associated with salivary cortisol secretion. *Psychoneuroendocrinology* 1998;23:353–  
17 370.  
18  
19  
20  
21  
22 12. Lai JC, Evans PD, Ng SH, et al. Optimism, positive affectivity, and salivary cortisol. *Br J*  
23 *Health Psychol* 2005;10:467-84.  
24  
25  
26  
27  
28 13. Steptoe A, Wardle J. Positive affect and biological function in everyday life. *Neurobiol*  
29 *Aging* 2005;26 Suppl 1:108-12.  
30  
31  
32  
33 14. Steptoe A, Wardle J, Marmot M, et al. Positive affect and health-related neuroendocrine,  
34 cardiovascular, and inflammatory processes. *Proc Natl Acad Sci USA* 2005;102(18):6508-12.  
35  
36  
37  
38 15. van Eck M, Berkhof H, Nicolson N, et al. The effects of perceived stress, traits, mood  
39 states, and stressful daily events on salivary cortisol. *Psychosom Med* 1996;58:447-58.  
40  
41  
42  
43 16. Jacobs N, Myin-Germeys I, Derom C, et al. A momentary assessment study of the  
44 relationship between affective and adrenocortical stress responses in daily life. *Biol Psychol*  
45 2007;74:60–66.  
46  
47  
48  
49  
50 17. Porges SW. The polyvagal theory: New insights into adaptive reactions of the autonomic  
51 nervous system. *Cleve Clin J Med* 2009; 76(Suppl 2):S86–S90.  
52  
53  
54  
55 18. Kuh D, Cooper R, Richards M, et al. A life course approach to healthy ageing: the HALCyon  
56 programme. *Public Health* 2012;126:193-5.  
57  
58  
59  
60

- 1  
2  
3  
4  
5 19. The Caerphilly and Speedwell Collaborative Group. Caerphilly and Speedwell collaborative  
6 heart disease studies. *J Epidemiol Community Health* 1984;38:259–262.  
7  
8  
9  
10 20. Syddall HE, Aihie SA, Dennison EM, et al. Cohort profile: the Hertfordshire cohort study.  
11 *Int J Epidemiol* 2005;34:1234–1242.  
12  
13  
14  
15 21. Kuh D, Pierce M, Adams J, et al. Cohort Profile: updating the cohort profile for the MRC  
16 National Survey of Health and Development: a new clinic-based data collection for ageing  
17 research. *Int J Epidemiol* 2011;40:e1–e9.  
18  
19  
20  
21  
22 22. Power C, Elliott J. Cohort profile: 1958 British birth cohort (National Child Development  
23 Study). *Int J Epidemiol* 2006;35:34-41.  
24  
25  
26  
27  
28 23. Kirschbaum C, Hellhammer DH. Salivary cortisol in psychobiological research: an overview.  
29 *Neuropsychobiology* 1989;22:150–169.  
30  
31  
32  
33 24. Gale CR, Cooper R, Craig L, et al. Cognitive function in childhood and lifetime cognitive  
34 change in relation to mental wellbeing in four cohorts of older people. *PLoS One*  
35 2012;7(9):e44860.  
36  
37  
38  
39  
40 25. Tennant R, Hiller L, Fishwick R, et al. The Warwick-Edinburgh Mental Well-being Scale  
41 (WEMWBS): development and UK validation. *Health Qual. Life Outcomes* 2007;27(5):63.  
42  
43  
44  
45 26. Badrick E, Bobak M, Britton A, et al. The relationship between alcohol consumption and  
46 cortisol secretion in an aging cohort. *J Clin Endocrinol Metab* 2008;93:750–757.  
47  
48  
49  
50  
51 27. Kumari M, Badrick E, Chandola T, et al. Measures of social position and cortisol secretion  
52 in an aging population: findings from the Whitehall II study. *Psychosom Med* 2010;72:27-34.  
53  
54  
55  
56  
57  
58  
59  
60

- 1  
2  
3 28. Geoffroy MC, Li L, Power C. Depressive symptoms and body mass index: co-morbidity and  
4 direction of association in a British birth cohort followed over 50 years. *Psychol Med*  
5 2014;44:2641-2652.  
6  
7  
8  
9  
10 29. Power C, Li L, Hertzman C. Cognitive development and cortisol patterns in mid-life:  
11 findings from a British birth cohort. *Psychoneuroendocrinology* 2008;33:530-9.  
12  
13  
14  
15 30. Reid JD, Intrieri RC, Susman EJ, et al. The relationship of serum and salivary cortisol in a  
16 sample of healthy elderly. *J Gerontol* 1992;47:176—179.  
17  
18  
19  
20 31. Adam EK, Kumari M. Assessing salivary cortisol in large-scale, epidemiological research.  
21 *Psychoneuroendocrinology* 2009;34:1423-36.  
22  
23  
24  
25 32. DerSimonian R, Laird N. Meta-analysis in clinical trials. *Control Clin Trials* 1986;7:177-88.  
26  
27  
28  
29 33. Berglund L. Regression dilution bias: Tools for correction methods and sample size  
30 calculation. *Upsala J Med Sci* 2012;117:279-83.  
31  
32  
33  
34 34. Steptoe A, Gibson EL, Hamer M, et al. Neuroendocrine and cardiovascular correlates of  
35 positive affect measured by ecological momentary assessment and by questionnaire.  
36 *Psychoneuroendocrinology* 2007;32:56-64.  
37  
38  
39  
40 35. Steptoe A, O'Donnell K, Badrick E, et al. Neuroendocrine and inflammatory factors  
41 associated with positive affect in healthy men and women: the Whitehall II study. *Am J*  
42 *Epidemiol* 2008;167:96-102.  
43  
44  
45  
46 36. Hoppmann CA, Klumb PL. Daily goal pursuits predict cortisol secretion and mood states in  
47 employed parents with preschool children. *Psychosom Med* 2006;68:887-94.  
48  
49  
50  
51 37. Davydov DM, Shapiro D, Goldstein IB, et al. Moods in everyday situations: effects of  
52 menstrual cycle, work, and stress hormones. *J Psychosom Res* 2005;58:343–349.  
53  
54  
55  
56  
57  
58  
59  
60

- 1  
2  
3 38. Simpson EE, McConville C, Rae, G., et al. Salivary cortisol, stress and mood in healthy older adults:  
4 the Zenith study. *Biol Psychol* 2008;78(1):1-9  
5  
6  
7  
8 39. Polk DE, Cohen S, Doyle WJ, et al. State and trait affect as predictors of salivary cortisol in  
9 healthy adults. *Psychoneuroendocrinology* 2005;30:261-272.  
10  
11  
12  
13 40. Dinan TG. Glucocorticoids and the genesis of depressive illness. A psychobiological model.  
14 *Br J Psych* 1994;164:365-71.  
15  
16  
17  
18 41. Stokes PE. The potential role of excessive cortisol induced by HPA hyperfunction in the  
19 pathogenesis of depression. *Eur Neuropsychopharm* 1995;77-82.  
20  
21  
22  
23 42. Hostinar CE, Gunnar MR. Social Support Can Buffer against Stress and Shape Brain Activity.  
24 *AJOB Neurosci* 2015;6:34-42.  
25  
26  
27  
28 43. Riley RD, Lambert PC, Abo-Zaid G. Meta-analysis of individual participant data: rationale,  
29 conduct, and reporting. *Br Med J* 2010;340, 221.  
30  
31  
32  
33  
34  
35  
36  
37  
38  
39  
40  
41  
42  
43  
44  
45  
46  
47  
48  
49  
50  
51  
52  
53  
54  
55  
56  
57  
58  
59  
60

Table 1: Descriptive statistics of participants by study

|                                                                 | CaPS                     | HCS                     | NSHD                    | NCDS                    |
|-----------------------------------------------------------------|--------------------------|-------------------------|-------------------------|-------------------------|
| Sample with WEMWBS and cortisol; n                              | 592                      | 1055                    | 1736                    | 5337                    |
| Gender; n(%) male                                               | 530 (100)                | 463 (44)                | 809 (47)                | 2464 (50)               |
| Age range at cortisol measurement (years); [mean (sd)]          | 65 – 82<br>[72.8 (4.0)]  | 60 – 73<br>[66.6 (2.7)] | 62 – 64<br>[63.6 (0.8)] | 44 – 46<br>[44.1 (0.2)] |
| Age range at WEMWBS assessment (years); [mean (sd)]             | 73 - 90<br>[80.1 (3.9 )] | 69 – 78<br>[73.2 (2.4)] | 62 - 64<br>[63.6 (0.8)] | 50 – 51<br>[50.7(0.1)]  |
| Follow-up time cortisol to WEMWBS assessment (years); mean (sd) | 7.6 (0.4)                | 6.6 (1.2)               | 0                       | 6.6 (0.3)               |
| BMI (kg/m <sup>2</sup> ); mean(sd)                              | 28.2 (3.8)               | 26.9 (4.2)              | 27.9 (4.8)              | 27.1 (4.7)              |
| Adult current smoking status; n (%) smoker                      | 53 (11.0)                | 84 (8.1)                | 160 (10.2)              | 893 (18.5)              |
| Adult social class; n(%) manual                                 | 303 (59.5)               | 400 (39)                | 499 (29.2)              | 1626 (34.1)             |
| WEMWBS score; mean (sd)                                         | 53.3 (10.6)              | 51.7 (8.1)              | 51.8 (8.0)              | 49.5 (7.9)              |
| Sampling times; mean                                            |                          |                         |                         |                         |
| Waking sample                                                   | 7.37AM                   | N/A                     | 7.11AM                  | N/A                     |
| Waking + 30mins (+45 mins for NCDS)                             | 8.13AM                   |                         | 7.42AM                  | 8.11AM                  |
| Waking + 3h 45 mins                                             | N/A                      |                         | N/A                     | 11:11AM                 |
| 2pm sample                                                      | 2.11PM                   |                         | N/A                     | N/A                     |
| Evening sample                                                  | 10.05PM                  |                         | 9.27PM                  | N/A                     |
| Serum cortisol (nmol/L)                                         | N/A                      | 258.1 (81.2)            | N/A                     | N/A                     |
| Salivary cortisol (nmol/L)                                      |                          |                         |                         |                         |
| Early morning; mean (sd)                                        | 19.7 (9.5)               |                         | 22.9 (9.6)              | 21.3 (10.8)             |
| Night time; median (IQR)                                        | 2.3 (1.5, 3.5)           |                         | 2.4 (1.7,3.7)           | N/A                     |
| Diurnal slope (nmol/L/h); mean (sd)                             | -1.13 (0.7)              |                         | -1.43 (0.7)             | -4.3 (3.8)              |
| Exclusions due to being on corticosteroids; n(%) <sup>a</sup>   | 62 (10%)                 | 13 (1.2%)               | 19(1.1%)                | 396 (7.5) <sup>a</sup>  |

<sup>a</sup>endocrine medication



Table 2. Overall summary estimates of effect for the associations between cortisol measures and wellbeing from a series of meta-analyses.

|                        | Included cohorts | Number of individuals | Mean difference in WEMWBS score (95% CI) per SD increase in cortisol |         |                        |                      |                                 |         |                        |                      |
|------------------------|------------------|-----------------------|----------------------------------------------------------------------|---------|------------------------|----------------------|---------------------------------|---------|------------------------|----------------------|
|                        |                  |                       | Model 1 <sup>a</sup>                                                 |         |                        |                      | Model 2 <sup>b</sup>            |         |                        |                      |
|                        |                  |                       | Regression coefficient (95% CI)                                      | P-value | Tests of heterogeneity | P-value <sup>c</sup> | Regression coefficient (95% CI) | P-value | Tests of heterogeneity | P-value <sup>c</sup> |
|                        |                  |                       |                                                                      |         | I <sup>2</sup> (%)     |                      |                                 |         | I <sup>2</sup> (%)     |                      |
| Early morning cortisol | All              | 7515                  | 0.02<br>(-0.17,0.21)                                                 | 0.8     | 2.3                    | 0.4                  | 0.01<br>(-0.22,0.24)            | 0.9     | 18.0                   | 0.3                  |
| Evening cortisol       | CaPS             | 1756                  | -0.47<br>(-1.00,0.05)                                                | 0.08    | 20.3                   | 0.3                  | -0.31<br>(-0.83,0.21)           | 0.2     | 19.1                   | 0.3                  |
| Flatter diurnal slope  | NSHD             |                       |                                                                      |         |                        |                      |                                 |         |                        |                      |
|                        | CaPS             | 6490                  | -0.07<br>(-0.27,0.14)                                                | 0.5     | 0.0                    | 0.6                  | -0.08<br>(-0.28,0.13)           | 0.5     | 0.0                    | 0.6                  |
|                        | NCDS             |                       |                                                                      |         |                        |                      |                                 |         |                        |                      |

<sup>a</sup>sex, age at cortisol assessment, follow-up time to wellbeing assessment; <sup>b</sup>Model 1 plus body mass index, smoking status, adult social class; <sup>c</sup>p-values from Cochran's Q statistic performed as a test of between-study heterogeneity

1  
2  
3  
4  
5  
6  
7  
8  
9  
10  
11  
12  
13  
14  
15  
16  
17  
18  
19  
20  
21  
22  
23  
24  
25  
26  
27  
28  
29  
30  
31  
32  
33  
34  
35  
36  
37  
38  
39  
40  
41  
42  
43  
44  
45  
46  
47  
48  
49  
50  
51  
52  
53  
54  
55  
56  
57  
58  
59  
60

Figure Legend

Figure 1. Meta-analysis of the association between wellbeing and (A) early morning cortisol; (B) evening cortisol; (C) flatter diurnal slope. All estimates are adjusted for sex and follow-up time.

For peer review only

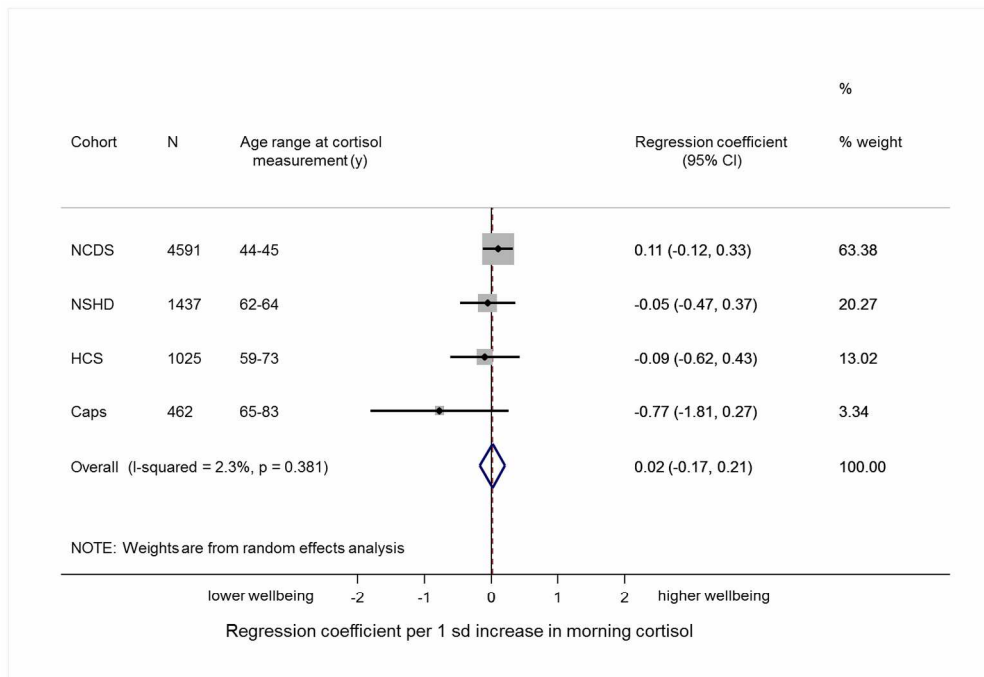

Figure 1A

276x190mm (300 x 300 DPI)

View only

1  
2  
3  
4  
5  
6  
7  
8  
9  
10  
11  
12  
13  
14  
15  
16  
17  
18  
19  
20  
21  
22  
23  
24  
25  
26  
27  
28  
29  
30  
31  
32  
33  
34  
35  
36  
37  
38  
39  
40  
41  
42  
43  
44  
45  
46  
47  
48  
49  
50  
51  
52  
53  
54  
55  
56  
57  
58  
59  
60

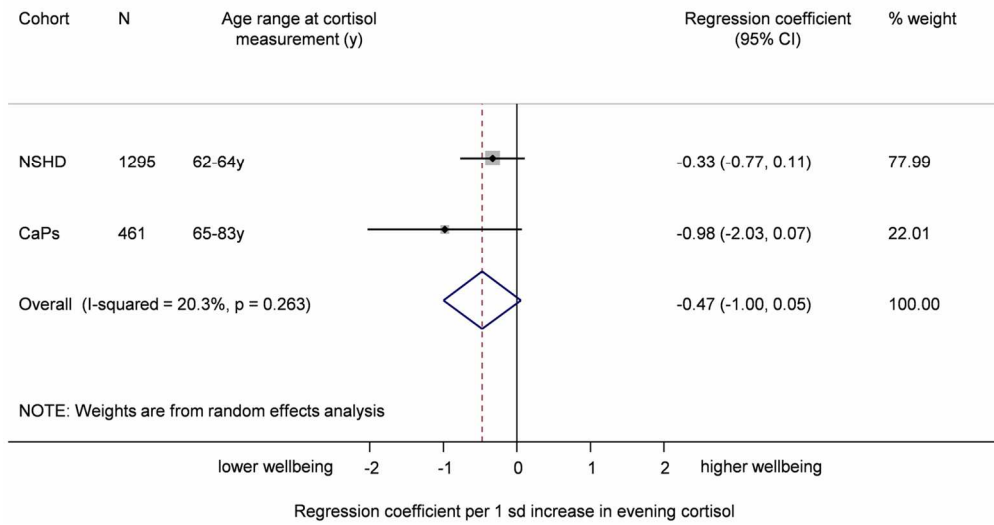

137x74mm (300 x 300 DPI)

review only

1  
2  
3  
4  
5  
6  
7  
8  
9  
10  
11  
12  
13  
14  
15  
16  
17  
18  
19  
20  
21  
22  
23  
24  
25  
26  
27  
28  
29  
30  
31  
32  
33  
34  
35  
36  
37  
38  
39  
40  
41  
42  
43  
44  
45  
46  
47  
48  
49  
50  
51  
52  
53  
54  
55  
56  
57  
58  
59  
60

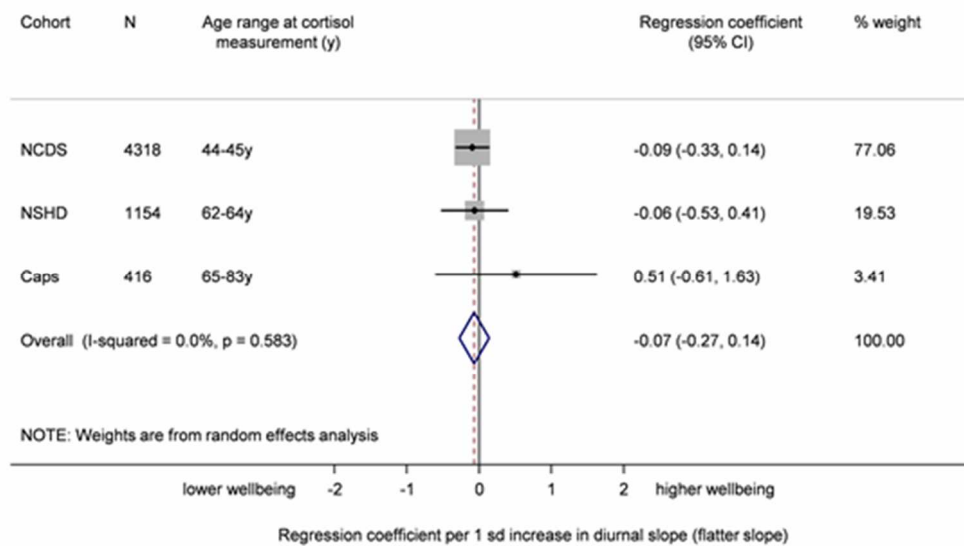

Figure 1C

46x28mm (300 x 300 DPI)

Review only

## STROBE Statement—checklist of items that should be included in reports of observational studies

|                              | <b>Recommendation</b>                                                                                                                                                                | <b>Page</b> |
|------------------------------|--------------------------------------------------------------------------------------------------------------------------------------------------------------------------------------|-------------|
| <b>Title and abstract</b>    | (a) Indicate the study's design with a commonly used term in the title or the abstract                                                                                               | 1,2         |
|                              | (b) Provide in the abstract an informative and balanced summary of what was done and what was found                                                                                  | 1,2         |
| <b>Introduction</b>          |                                                                                                                                                                                      |             |
| Background/rationale         | Explain the scientific background and rationale for the investigation being reported                                                                                                 | 4           |
| Objectives                   | State specific objectives, including any prespecified hypotheses                                                                                                                     | 5           |
| <b>Methods</b>               |                                                                                                                                                                                      |             |
| Study design                 | Present key elements of study design early in the paper                                                                                                                              | 5           |
| Setting                      | Describe the setting, locations, and relevant dates, including periods of recruitment, exposure, follow-up, and data collection                                                      | 5,6         |
| Participants                 | (a) <i>Cohort study</i> —Give the eligibility criteria, and the sources and methods of selection of participants. Describe methods of follow-up                                      | 5,6         |
|                              | (b) <i>Cohort study</i> —For matched studies, give matching criteria and number of exposed and unexposed                                                                             | N/A         |
| Variables                    | Clearly define all outcomes, exposures, predictors, potential confounders, and effect modifiers. Give diagnostic criteria, if applicable                                             | 6-8         |
| Data sources/<br>measurement | For each variable of interest, give sources of data and details of methods of assessment (measurement). Describe comparability of assessment methods if there is more than one group | 5-7         |
| Bias                         | Describe any efforts to address potential sources of bias                                                                                                                            | 9-10        |
| Study size                   | Explain how the study size was arrived at                                                                                                                                            | 9, Table 1  |
| Quantitative variables       | Explain how quantitative variables were handled in the analyses. If applicable, describe which groupings were chosen and why                                                         | 10          |
| Statistical methods          | (a) Describe all statistical methods, including those used to control for confounding                                                                                                | 10          |
|                              | (b) Describe any methods used to examine subgroups and interactions                                                                                                                  | 10          |
|                              | (c) Explain how missing data were addressed                                                                                                                                          | 10          |
|                              | (d) <i>Cohort study</i> —If applicable, explain how loss to follow-up was addressed                                                                                                  | 10          |
|                              | (e) Describe any sensitivity analyses                                                                                                                                                | 11          |

Continued on next page

| <b>Results</b>           |                                                                                                                                                                                                              | <b>Page</b> |
|--------------------------|--------------------------------------------------------------------------------------------------------------------------------------------------------------------------------------------------------------|-------------|
| Participants             | (a) Report numbers of individuals at each stage of study—eg numbers potentially eligible, examined for eligibility, confirmed eligible, included in the study, completing follow-up, and analysed            | 9, Table 1  |
|                          | (b) Give reasons for non-participation at each stage                                                                                                                                                         |             |
|                          | (c) Consider use of a flow diagram                                                                                                                                                                           | N/A         |
| Descriptive data         | (a) Give characteristics of study participants (eg demographic, clinical, social) and information on exposures and potential confounders                                                                     | Table 1     |
|                          | (b) Indicate number of participants with missing data for each variable of interest                                                                                                                          |             |
|                          | (c) <i>Cohort study</i> —Summarise follow-up time (eg, average and total amount)                                                                                                                             |             |
| Outcome data             | <i>Cohort study</i> —Report numbers of outcome events or summary measures over time                                                                                                                          | Table 1     |
| Main results             | (a) Give unadjusted estimates and, if applicable, confounder-adjusted estimates and their precision (eg, 95% confidence interval). Make clear which confounders were adjusted for and why they were included | Table 2     |
|                          | (b) Report category boundaries when continuous variables were categorized                                                                                                                                    |             |
|                          | (c) If relevant, consider translating estimates of relative risk into absolute risk for a meaningful time period                                                                                             |             |
| Other analyses           | Report other analyses done—eg analyses of subgroups and interactions, and sensitivity analyses                                                                                                               | 12          |
| <b>Discussion</b>        |                                                                                                                                                                                                              |             |
| Key results              | Summarise key results with reference to study objectives                                                                                                                                                     | 13          |
| Limitations              | Discuss limitations of the study, taking into account sources of potential bias or imprecision. Discuss both direction and magnitude of any potential bias                                                   | 14          |
| Interpretation           | Give a cautious overall interpretation of results considering objectives, limitations, multiplicity of analyses, results from similar studies, and other relevant evidence                                   | 13-14       |
| Generalisability         | Discuss the generalisability (external validity) of the study results                                                                                                                                        | 14          |
| <b>Other information</b> |                                                                                                                                                                                                              |             |
| Funding                  | Give the source of funding and the role of the funders for the present study and, if applicable, for the original study on which the present article is based                                                | 16          |

# BMJ Open

## Diurnal cortisol and mental wellbeing in middle and older age: evidence from four cohort studies

|                                 |                                                                                                                                                                                                                                                                                                                                                                                                                                                                                                                                                                                                                                                                                                                                                                                         |
|---------------------------------|-----------------------------------------------------------------------------------------------------------------------------------------------------------------------------------------------------------------------------------------------------------------------------------------------------------------------------------------------------------------------------------------------------------------------------------------------------------------------------------------------------------------------------------------------------------------------------------------------------------------------------------------------------------------------------------------------------------------------------------------------------------------------------------------|
| Journal:                        | <i>BMJ Open</i>                                                                                                                                                                                                                                                                                                                                                                                                                                                                                                                                                                                                                                                                                                                                                                         |
| Manuscript ID                   | bmjopen-2017-016085.R2                                                                                                                                                                                                                                                                                                                                                                                                                                                                                                                                                                                                                                                                                                                                                                  |
| Article Type:                   | Research                                                                                                                                                                                                                                                                                                                                                                                                                                                                                                                                                                                                                                                                                                                                                                                |
| Date Submitted by the Author:   | 28-Jun-2017                                                                                                                                                                                                                                                                                                                                                                                                                                                                                                                                                                                                                                                                                                                                                                             |
| Complete List of Authors:       | Stafford, Mai; University College London, MRC Unit for Lifelong Health and Ageing<br>Ben-Shlomo, Yoav; University of Bristol,<br>Cooper, Cyrus; University of Southampton and Southampton University Hospitals NHS Trust, MRC Lifecourse Epidemiology Unit<br>Gale, Catharine; MRC Epidemiology Resource Centre; University of Edinburgh, Department of Psychology<br>Gardner, Mike; University of Oxford, Nuffield Department of Population Health<br>Geoffroy, Marie-Claude; McGill University, McGill Group for Suicide Studies at Douglas Mental Health University Institute; McGill University, Department of Psychiatry<br>Power, Christine<br>Kuh, Diana; MRC Unit for Lifelong Health and Ageing at UCL,<br>Cooper, Rachel; UCL, MRC Unit for Lifelong Health and Ageing at UCL |
| <b>Primary Subject Heading</b>: | Epidemiology                                                                                                                                                                                                                                                                                                                                                                                                                                                                                                                                                                                                                                                                                                                                                                            |
| Secondary Subject Heading:      | Mental health                                                                                                                                                                                                                                                                                                                                                                                                                                                                                                                                                                                                                                                                                                                                                                           |
| Keywords:                       | meta-analysis, individual participant data, positive psychology                                                                                                                                                                                                                                                                                                                                                                                                                                                                                                                                                                                                                                                                                                                         |
|                                 |                                                                                                                                                                                                                                                                                                                                                                                                                                                                                                                                                                                                                                                                                                                                                                                         |

SCHOLARONE™  
Manuscripts



1  
2  
3 **Diurnal cortisol and mental wellbeing in middle and older age: evidence from four cohort**  
4 **studies**  
5  
6  
7

8 Authors information  
9

10 Mai Stafford<sup>1</sup>, Yoav Ben-Shlomo<sup>2</sup>, Cyrus Cooper<sup>3</sup>, Catharine Gale<sup>3,4</sup>, Michael P. Gardner<sup>5</sup>,  
11 Marie-Claude Geoffroy<sup>6</sup>, Chris Power<sup>7</sup>, Diana Kuh<sup>1</sup>, Rachel Cooper<sup>1</sup>  
12  
13

14  
15 <sup>1</sup>MRC Unit for Lifelong Health and Ageing at UCL, UCL, London, UK  
16

17 <sup>2</sup>School of Social and Community Medicine, University of Bristol, Bristol, UK  
18

19 <sup>3</sup>MRC Lifecourse Epidemiology Unit, University of Southampton, Southampton, UK  
20

21 <sup>4</sup>Department of Psychology, University of Edinburgh, Edinburgh, UK  
22

23 <sup>5</sup>Nuffield Department of Population Health, University of Oxford, Oxford, UK  
24

25 <sup>6</sup>McGill Group for Suicide Studies at Douglas Mental Health University Institute; and  
26 Department of Psychiatry, McGill University, Montréal, Canada  
27

28 <sup>7</sup>Population, Policy and Practice Programme, UCL Great Ormond Street Institute of Child  
29 Health, UCL, London, UK  
30  
31

32  
33 Correspondence to: Dr Mai Stafford, MRC Unit for Lifelong Health and Ageing at UCL, 33  
34 Bedford Place, London, WC1B 5JU; email: [m.stafford@ucl.ac.uk](mailto:m.stafford@ucl.ac.uk); tel: +44 207 570 5712  
35  
36  
37

38  
39 Word count: 3313  
40

41 Number of figures and tables: 4 figures, 2 tables  
42  
43  
44  
45  
46  
47  
48  
49  
50  
51  
52  
53  
54  
55  
56  
57  
58  
59  
60

1  
2  
3  
4  
5 **Diurnal cortisol and mental wellbeing in middle and older age: evidence from four cohort**  
6 **studies**  
7  
8  
9

10 ABSTRACT

11 Objectives: We conducted individual participant meta-analysis to test the hypothesis that  
12 cortisol patterns indicative of dysregulated HPA-axis functioning would be prospectively  
13 associated with poorer wellbeing at follow-up.  
14

15  
16  
17 Setting: Four large UK-based cohort studies

18  
19 Participants: Those providing valid salivary or serum cortisol samples (n=7515 for morning  
20 cortisol; n=1612 for cortisol awakening response) at baseline (age 44-82) and wellbeing data  
21 on the Warwick Edinburgh Mental Wellbeing Scale at follow-up (0-8 years) were included.  
22

23 Results: Wellbeing was not associated with morning cortisol, diurnal slope or awakening  
24 response though a borderline association with evening cortisol was found. Adjusting for sex  
25 and follow-up time, each 1 standard deviation increase in evening cortisol was associated  
26 with a -0.47 (95% CI -1.00, 0.05) point lower wellbeing. This was attenuated by adjustment  
27 for body mass index, smoking and socioeconomic position. Between-study heterogeneity was  
28 low.  
29

30 Conclusions: This study does not support the hypothesis that diurnal cortisol is prospectively  
31 associated with wellbeing up to 8 years later. However, replication in prospective studies with  
32 cortisol samples over multiple days is required.  
33  
34

35  
36  
37  
38  
39  
40  
41  
42  
43  
44  
45  
46  
47  
48  
49  
50  
51  
52  
53  
54  
55  
56  
57  
58  
59  
60  
Keywords: meta-analysis; individual participant data; positive psychology;

1  
2  
3  
4  
5  
6  
7  
8  
9  
10  
11  
12  
13  
14  
15  
16  
17  
18  
19  
20  
21  
22  
23  
24  
25  
26  
27  
28  
29  
30  
31  
32  
33  
34  
35  
36  
37  
38  
39  
40  
41  
42  
43  
44  
45  
46  
47  
48  
49  
50  
51  
52  
53  
54  
55  
56  
57  
58  
59  
60

### Strengths

- Individual participant meta-analysis based on 1612-7515 participants with cortisol data
- Prospective study with up to 8 years of follow-up
- Validated mental wellbeing instrument based on 14 items capturing hedonic and eudaimonic components harmonized across cohorts

### Limitations

- Salivary cortisol samples taken over 1 or 2 days; up to a maximum of 4 times per day
- Actual waking time was not recorded in all studies

## INTRODUCTION

Cortisol is a marker of hypothalamic-pituitary-adrenal (HPA) axis functioning and follows a diurnal rhythm. Large-scale epidemiological studies have measured salivary cortisol sampled several times during the course of a day to capture its rising levels during the awakening response and the subsequent decline across the day. The mental health and wellbeing consequences of raised cortisol levels are of interest particularly among older people given that some studies find they have higher evening cortisol levels[1] and greater total cortisol output throughout the day[2] compared with younger people though there is inter-individual variation in age-related change in cortisol [3] and this may reflect age-related change in disease rather than normal ageing [4].

Positive mental wellbeing is a multidimensional concept that captures hedonic (e.g. happiness and experiencing pleasure) and eudemonic (e.g. self-realization and psychologically functioning at potential) aspects of mental health that are distinct from depressive illness.[5] Cortisol may be linked to a positive psychological state through its effect on mood-altering neurotransmitters including serotonin.[6] Cortisol also has energy-mobilising properties that may in turn promote mental wellbeing.[7]

Two studies of healthy older people found no association between cortisol levels and positive wellbeing (captured by the positive items of the General Health Questionnaire[8] or by daily positive emotions[9]). A study of women aged 65 and over found that greater eudaimonic wellbeing was associated with flatter cortisol slope over the day, though this was due to lower morning cortisol levels which remained low across the day.[10] All studies were small (less than 200 participants). In younger adults (i.e. 55 years and younger), some studies have found that greater positive affect or happiness was associated with lower total cortisol

1  
2  
3 output[11-14] but others have not.[15,16] Greater optimism has also been associated with a  
4  
5 smaller awakening response.[12]  
6

7  
8         These studies have not examined prospective associations between baseline cortisol  
9  
10 patterns and wellbeing at follow-up in large, population-based samples. Although stressors  
11  
12 are typically associated with HPA axis activation and decreases in vagal tone, some studies  
13  
14 suggest that there may in some cases be a subsequent response involving the dorso-vagal  
15  
16 parasympathetic system and down-regulation of the HPA axis resulting in low cortisol levels  
17  
18 [17]. If this is the case then a long-term inverse association between cortisol and wellbeing  
19  
20 may not be evident.  
21  
22

23  
24         The aim of the current study was to draw on individual participant data from four  
25  
26 large British cohort studies using meta-analysis to examine the longitudinal associations  
27  
28 between diurnal cortisol and positive mental wellbeing captured by an instrument which  
29  
30 summarizes positive thoughts and feelings from both hedonic and eudemonic perspectives.  
31  
32 We hypothesized that cortisol patterns indicative of disrupted HPA axis functioning (i.e. lower  
33  
34 early morning levels, higher evening levels, less steep decline (i.e. flatter response) across the  
35  
36 day and larger awakening response) would be associated with lower wellbeing at follow-up.  
37  
38  
39  
40  
41  
42  
43  
44

## 45 METHODS

### 46 *Cohort studies*

47  
48 We used the four cohort studies from the Healthy Ageing across the Life Course (HALCyon)  
49  
50 cross cohort research programme[18] with data on both cortisol and Warwick Edinburgh  
51  
52 Mental Wellbeing Scale (WEMWBS): the Caerphilly Prospective Study (CaPS)[19]; the  
53  
54 Hertfordshire Cohort Study (HCS)[20]; the MRC National Survey of Health and Development  
55  
56  
57  
58  
59  
60

1  
2  
3 (NSHD)[21]; and the National Child Development Study (NCDS).[22] All studies received  
4  
5 appropriate ethical approval.[19-22]  
6  
7  
8  
9

#### 10 *Caerphilly Prospective Study (CaPS)*

11  
12 CaPS is a cohort of men who were recruited when they were aged 45–59 years, between 1979  
13  
14 and 1983, from the town of Caerphilly and adjacent villages in South Wales. In the second  
15  
16 wave (1984 – 1988) the original cohort was supplemented with men of a similar age who had  
17  
18 moved into the defined area. Salivary cortisol was assessed at phase 5 of data collection in  
19  
20 2000–2004 when participants were aged 65 to 82 years and wellbeing was assessed in 2011  
21  
22 when they were aged 73 to 90 years.  
23  
24  
25  
26  
27  
28

#### 29 *Hertfordshire Cohort Study (HCS)*

30  
31 HCS is a cohort of men and women born in East, North or West Hertfordshire between 1931  
32  
33 and 1939 whose birth and infant records were available and who were alive and still living in  
34  
35 Hertfordshire in the 1990s. Cortisol was assessed at wave 1 of the data collection (1999–  
36  
37 2004) when participants were aged 60 – 73 years and wellbeing was assessed in 2008 when  
38  
39 they were aged 69 – 78.  
40  
41  
42  
43  
44  
45

#### 46 *The MRC National Survey of Health and Development (NSHD)*

47  
48 NSHD is a nationally representative sample of people born in England, Scotland, and Wales  
49  
50 during one week in March 1946 followed prospectively since birth. Cortisol and wellbeing  
51  
52 data were collected in 2008-10 when cohort members were aged 62-64 years.  
53  
54  
55  
56

#### 57 *The National Child Development Study (NCDS)*

1  
2  
3 NCDS is a nationally representative sample of people born in England, Scotland, and Wales  
4  
5 during 1 week in March 1958 followed prospectively since birth. Cortisol was assessed as part  
6  
7 of a bio-medical survey (2002–2004) when cohort members were aged 44-45 and wellbeing  
8  
9 was assessed at a follow-up (2008-2009) at mean age of 50.7.  
10  
11

### 12 13 14 15 ***Cortisol***

16  
17 All study members who had not withdrawn or been lost to follow-up at the relevant sweep  
18  
19 were invited to participate in the cortisol sampling. In HCS, one fasting morning serum cortisol  
20  
21 sample was taken from each participant at a research clinic between 8.30 and 9.30 AM (the  
22  
23 exact timing was not recorded), frozen and subsequently measured by radioimmunoassay.  
24  
25 Salivary cortisol samples were collected in CaPS, NSHD and NCDS at multiple times across the  
26  
27 day with participants shown how to collect saliva using plain cotton wool swabs (salivettes) at  
28  
29 home. Subjects were asked to chew on the salivettes for 1-2 min and a saliva sample was  
30  
31 obtained. In CaPS, participants were requested to take samples on waking, 30 minutes later,  
32  
33 at 2 pm and 10 pm on two consecutive days. In NSHD, samples were taken on waking, 30  
34  
35 minutes later and at 9 pm. Samples in NCDS were taken in the first 45 minutes after waking  
36  
37 and 3 hours later. Samples from CaPS, NSHD and NCDS were frozen and subsequently assayed  
38  
39 by radioimmunoassay done at the University of Dresden which specializes in high through-put  
40  
41 cortisol assays.[23]  
42  
43  
44  
45  
46  
47  
48  
49

### 50 51 ***Mental wellbeing***

52  
53 Positive mental wellbeing was assessed using WEMWBS in all four studies. This self-  
54  
55 completion scale captures positive affect, satisfying interpersonal relationships and positive  
56  
57 functioning. Items are worded positively and respondents are asked to indicate how  
58  
59  
60

1  
2  
3 frequently, on a five point scale, they have experienced each statement over the last two  
4  
5 weeks. Statements include “I’ve been feeling good about myself”, “I’ve been feeling close to  
6  
7 other people”, “I’ve been interested in new things” and “I’ve been feeling optimistic about  
8  
9 the future”. Scores theoretically range from 14 to 70 with 70 indicating highest wellbeing.  
10  
11 Where three or fewer items were missing, values were imputed based on the average score  
12  
13 for completed items (CaPS n=43; HCS n=52; NSHD n=84; NCDS n=103). Internal consistency of  
14  
15 the scale in all four cohorts was high (Cronbach alpha=0.91 in HCS, NSHD and NCDS and 0.93  
16  
17 in CaPS.[24] Validation work indicates good construct validity for a single factor structure as  
18  
19 well as good criterion validity and test-retest reliability and supports its use in general  
20  
21 population samples.[25]  
22  
23  
24  
25  
26  
27  
28

### 29 **Covariates**

30  
31 Key covariates that might confound the association between cortisol and wellbeing and which  
32  
33 had been assessed in each of the cohorts were chosen *a priori*: sex, age at cortisol  
34  
35 measurement, follow-up time to measurement of wellbeing, body mass index (BMI), smoking,  
36  
37 and adult socio-economic position.[26-28] The covariates were measured at the same wave  
38  
39 as cortisol samples unless otherwise stated. BMI was calculated as measured weight divided  
40  
41 by the square of height and was categorized into quartiles when there was evidence of  
42  
43 deviation from linearity in the association with wellbeing (NSHD, NCDS). Smoking was  
44  
45 reported by participants and dichotomized into current smoker vs ex- and never smoker  
46  
47 (NCDS smoking data at age 42 years). Adult socioeconomic position was derived from own  
48  
49 occupational class (CaPS at age 47-67, HCS at age 60-73, NSHD at age 53 or earlier if missing,  
50  
51 NCDS at age 42) and grouped as manual or non-manual occupation (the latter indicating  
52  
53 greater socioeconomic advantage).  
54  
55  
56  
57  
58  
59  
60



### ***Initial treatment of the data and standardization***

Cortisol has a marked circadian rhythm and therefore the time of day at which it is sampled will affect its level. In CaPS, NSHD and NCDS actual times when the salivary samples were taken were recorded by participants. Observed values were adjusted for the time of sampling by fitting a linear or polynomial function to the association between cortisol and time of measurement and adding the resulting residuals from the best fit model to the overall mean cortisol value. This gives the estimated cortisol level at the time specified in the protocol for each participant. Morning cortisol (salivary or serum) levels were available in all four cohorts (CaPS, HCS, NSHD and NCDS) and night time values in CaPS and NSHD. For NCDS, the later cortisol measure was taken 3 hours after the morning measure on the same day (around 11.15AM) and there was no evening measure. However past publications support the notion that the diurnal decline over this shorter period is a good surrogate for the decline from morning till night[29] and hence this measure was used to derive a measure of diurnal slope. HCS collected serum cortisol, the levels of which are around 20 times higher than the free cortisol concentrations found in saliva. However, a study on the relationship between serum and salivary cortisol in healthy individuals[30] showed that correlations were high whether taken at the same time (>0.90) or 70 minutes apart (0.54—0.94). Those participants who reported taking cortico-steroid medication were excluded from the analysis sample (CaPS n=62; HCS n=13; NSHD n=19). In NCDS, participants were excluded from analysis if they reported taking endocrine system medication (n= 396). Outlying salivary cortisol values greater than 100 nmol/L were removed (CaPS n=5; NSHD n=7; NCDS n=21), since high cortisol values can have substantial statistical influence on estimates and it is unclear what these high values represent.[31] Morning salivary cortisol values that were not between 5am and noon

1  
2  
3 were removed and evening values if they were before 8pm, since these participants with  
4  
5 atypical sleeping hours may have substantially different cortisol profiles. In CaPS, cortisol  
6  
7 values were averaged over the same measures obtained on two consecutive days. Early  
8  
9 morning salivary cortisol was computed in CaPS and NSHD as the mean of waking and 30 min  
10  
11 samples; to be comparable, in NCDS the cortisol measure taken within 45 minutes after  
12  
13 waking was used. In HCS morning serum cortisol was used.  
14  
15  
16  
17  
18  
19

20 To be able to combine the cohorts in a meta-analysis, the cortisol values were standardized  
21  
22 by deriving study-specific z-scores. In NCDS, both early and late morning cortisol were  
23  
24 positively skewed, as was night time cortisol in CaPS and NSHD, so values were  $\log_e$   
25  
26 transformed before they were converted to z-scores. In addition to the early morning and  
27  
28 night time cortisol measures, we derived the diurnal slope (CaPS, NSHD, NCDS) as early  
29  
30 morning value subtracted from the evening (or late morning in NCDS) value and divided by  
31  
32 the lapsed time period. The overall slope is negative and so positive z-scores indicate a flatter  
33  
34 response. The cortisol awakening response (CAR) was derived as the difference between 30  
35  
36 minute post waking sample and the waking sample (CaPS, NSHD).  
37  
38  
39  
40  
41  
42  
43  
44  
45

### 46 ***Statistical Methods***

47  
48 A two stage meta-analysis was performed. In the first stage, we modelled WEMWBS as a  
49  
50 function of each continuous diurnal cortisol indicator in turn using linear regression in each  
51  
52 cohort separately, with adjustment for i) sex, age at cortisol measurement and follow-up time  
53  
54 to the wellbeing measurement, ii) additional adjustment for BMI, smoking status and  
55  
56 socioeconomic position. There was no evidence of deviation from linearity in the association  
57  
58  
59  
60

1  
2  
3 between any of the cortisol measures and WEMWBS. There was no evidence of interaction  
4  
5 between sex and any of the cortisol measures. In sensitivity analysis to explore possible bias  
6  
7 arising from missing covariates , we adjusted for sex and age at cortisol measurement and  
8  
9 follow-up time i) using the maximum available sample with cortisol and wellbeing data  
10  
11 (results not presented), ii) using the sample restricted to only those participants that had  
12  
13 complete data on all covariates. Results did not materially differ for these two samples. In the  
14  
15 second stage, cohort-specific estimates were pooled in random-effects meta-analyses[32]  
16  
17 chosen a priori due to the expected heterogeneity between the different studies.  
18  
19  
20  
21  
22  
23

#### 24 Sensitivity analyses

25  
26 We corrected regression estimates for regression dilution bias arising from error in the  
27  
28 measurement of cortisol. The reliability ratios were estimated by regressing the cortisol  
29  
30 measure on day 2 on the measure on day 1 from CaPS data.[33] This yielded reliability ratios  
31  
32 of 0.554, 0.349 and 0.430 for morning, evening and slope cortisol respectively. In addition,  
33  
34 because both heightened and blunted CAR have been linked to raised disease risk, we tested  
35  
36 whether wellbeing differed for those with a CAR in the top third or bottom third relative to  
37  
38 the middle third.  
39  
40  
41  
42  
43  
44

#### 45 RESULTS

46  
47 The characteristics of the participants of the four cohorts in the analysis are shown in Table 1.  
48  
49 Age at time of wellbeing measurement ranged from mean (sd) age of 50.7 (0.1) years in NCDS  
50  
51 to 80.1 (3.9) years in CaPS. Mean wellbeing ranged from 49.5 (7.9) in NCDS to 53.3 (10.6) in  
52  
53 CaPS and increased with mean age of the cohort. Mean early morning cortisol values were  
54  
55 similar for the three cohorts (CaPS, NSHD, NCDS) that had measured salivary cortisol. Night  
56  
57  
58  
59  
60

1  
2  
3 time cortisol values were also similar although diurnal slope was more negative (indicating  
4  
5 greater decline) in NCDS than in NSHD and CaPS.  
6  
7

8  
9  
10 We found no evidence of an association between early morning cortisol and wellbeing in the  
11  
12 individual cohorts in sex, age and follow-up time adjusted models. The overall pooled estimate  
13  
14 was 0.02 (95% CI -0.17,0.21; p=0.8) and there was no evidence of heterogeneity in this  
15  
16 association across studies ( $I^2=2.3$ ; p for heterogeneity=0.4) (Table 2 and Figure 1). Further  
17  
18 adjustment for all covariates did not affect the overall pooled estimate 0.01 (95% CI -0.22,0.24;  
19  
20  $I^2=18.0$ ; p for heterogeneity=0.3).  
21  
22  
23

24  
25  
26 Sex, age and follow-up time adjusted associations between evening cortisol and wellbeing in  
27  
28 the individual cohorts were in the expected direction (i.e. higher evening cortisol was  
29  
30 associated with lower wellbeing) in NSHD: -0.33 (95% CI -0.77,0.11); CaPS -0.98 (95% CI -  
31  
32 2.03,0.07). This indicates a weak inverse association between evening cortisol and wellbeing  
33  
34 (Table 2 and Figure 2). Adjustment for BMI, smoking and social class attenuated this  
35  
36 association. Again, there was no evidence of heterogeneity across studies ( $I^2=19.1$ ; p for  
37  
38 heterogeneity =0.3).  
39  
40  
41  
42  
43  
44

45  
46 In the pooled analysis a flatter diurnal slope was associated with poorer wellbeing though this  
47  
48 was not statistically significant before or after adjustment for all covariates (Table 2 and Figure  
49  
50 3). Results excluding NCDS (based on decline in cortisol between early and late morning) were  
51  
52 similar (0.02 (95% CI -0.41, 0.46)). In the sex, age and follow-up time adjusted and in the fully  
53  
54 adjusted models, a higher CAR tended to be associated with lower wellbeing although the  
55  
56 association did not approach statistical significance (Table 2 and Figure 4).  
57  
58  
59  
60

1  
2  
3  
4  
5 In sensitivity analysis, correcting for regression dilution bias, the sex, age and follow-up time  
6 adjusted associations between cortisol and wellbeing were 0.036, -1.347 and -0.163 for  
7 morning, evening and slope cortisol respectively. We found no evidence that wellbeing  
8 differed according to thirds of the CAR distribution.  
9  
10  
11  
12  
13

## 14 15 16 17 DISCUSSION

18  
19 Based on meta-analysis of individual participant data from four large cohort studies,  
20 we found that morning cortisol, diurnal slope and CAR were not associated with wellbeing but  
21 there was evidence that higher evening cortisol was prospectively associated with lower  
22 positive mental wellbeing in middle and older age. The magnitude of this association was  
23 small (-0.06 standard deviations in wellbeing) in crude analysis though up to -0.17 standard  
24 deviations in wellbeing accounting for possible regression dilution bias. This association was  
25 attenuated by the inclusion of BMI, smoking and socioeconomic position. It remains unclear  
26 whether obesity is secondary to HPA axis dysregulation so this may represent over-  
27 adjustment for a variable on the explanatory pathway. Perceived stress is also linked to lower  
28 socioeconomic position, smoking and cortisol levels [27, 30] and so isolating an association  
29 between cortisol and wellbeing independently of these factors needs to be interpreted with  
30 caution.  
31  
32  
33  
34  
35  
36  
37  
38  
39  
40  
41  
42  
43  
44  
45  
46  
47

48 Evening cortisol is arguably the least affected by salivary sampling protocol deviations,  
49 which can bias associations between cortisol and wellbeing towards the null.[7] Furthermore,  
50 single-day sampling tends to bias cortisol estimates towards state rather than trait values,[31]  
51 which may also explain the lack of association with wellbeing up to eight years later. Only one  
52 of the included studies captured cortisol profiles on more than one day and this study (that is,  
53  
54  
55  
56  
57  
58  
59  
60

1  
2  
3 CaPS) only sampled cortisol on two days. We note that there was also a trend towards lower  
4  
5 wellbeing among those with higher morning cortisol in CaPS though this did not attain  
6  
7 statistical significance. Replication in additional studies with samples over multiple days is  
8  
9 warranted. We examined inter-individual differences in cortisol in relation to wellbeing up to  
10  
11 eight years after assessment of cortisol patterns. It is possible that an association between  
12  
13 cortisol and wellbeing would only be evident over a shorter lag time. When measured on the  
14  
15 same day, studies have found higher positive affect among those with lower cortisol  
16  
17 output.[14,34,35] In addition, lower output in the first 45 minutes after waking[8] and total  
18  
19 output across the day[10] has been associated with higher wellbeing over a period of 3-4  
20  
21 weeks. Where intensive study designs have been used to measure intra-individual change  
22  
23 based on serial measurements of both cortisol and wellbeing repeated over multiple days,  
24  
25 some studies find evidence of an inverse association between cortisol output and positive  
26  
27 affect[11,13,36-38] though others do not.[9,15,16] Trait positive affect has been found to  
28  
29 predict higher evening cortisol (in men only)[39] though we are not aware that a prospective  
30  
31 association between baseline cortisol and subsequent mental wellbeing has been assessed.  
32  
33 Future studies are warranted in order to examine the longitudinal association between  
34  
35 mental wellbeing and cortisol sampled over multiple days to more accurately capture trait  
36  
37 cortisol. In addition, cortisol samples taken at regular intervals throughout follow-up would  
38  
39 enable us to identify how changes in HPA-axis activation, such as hypocortisolism as a  
40  
41 response to chronic stress, might be related to mental wellbeing.

42  
43  
44  
45  
46  
47  
48  
49  
50  
51  
52  
53  
54  
55  
56  
57  
58  
59  
60  
61  
62  
63  
64  
65  
66  
67  
68  
69  
70  
71  
72  
73  
74  
75  
76  
77  
78  
79  
80  
81  
82  
83  
84  
85  
86  
87  
88  
89  
90  
91  
92  
93  
94  
95  
96  
97  
98  
99  
100  
101  
102  
103  
104  
105  
106  
107  
108  
109  
110  
111  
112  
113  
114  
115  
116  
117  
118  
119  
120  
121  
122  
123  
124  
125  
126  
127  
128  
129  
130  
131  
132  
133  
134  
135  
136  
137  
138  
139  
140  
141  
142  
143  
144  
145  
146  
147  
148  
149  
150  
151  
152  
153  
154  
155  
156  
157  
158  
159  
160  
161  
162  
163  
164  
165  
166  
167  
168  
169  
170  
171  
172  
173  
174  
175  
176  
177  
178  
179  
180  
181  
182  
183  
184  
185  
186  
187  
188  
189  
190  
191  
192  
193  
194  
195  
196  
197  
198  
199  
200  
201  
202  
203  
204  
205  
206  
207  
208  
209  
210  
211  
212  
213  
214  
215  
216  
217  
218  
219  
220  
221  
222  
223  
224  
225  
226  
227  
228  
229  
230  
231  
232  
233  
234  
235  
236  
237  
238  
239  
240  
241  
242  
243  
244  
245  
246  
247  
248  
249  
250  
251  
252  
253  
254  
255  
256  
257  
258  
259  
260  
261  
262  
263  
264  
265  
266  
267  
268  
269  
270  
271  
272  
273  
274  
275  
276  
277  
278  
279  
280  
281  
282  
283  
284  
285  
286  
287  
288  
289  
290  
291  
292  
293  
294  
295  
296  
297  
298  
299  
300  
301  
302  
303  
304  
305  
306  
307  
308  
309  
310  
311  
312  
313  
314  
315  
316  
317  
318  
319  
320  
321  
322  
323  
324  
325  
326  
327  
328  
329  
330  
331  
332  
333  
334  
335  
336  
337  
338  
339  
340  
341  
342  
343  
344  
345  
346  
347  
348  
349  
350  
351  
352  
353  
354  
355  
356  
357  
358  
359  
360  
361  
362  
363  
364  
365  
366  
367  
368  
369  
370  
371  
372  
373  
374  
375  
376  
377  
378  
379  
380  
381  
382  
383  
384  
385  
386  
387  
388  
389  
390  
391  
392  
393  
394  
395  
396  
397  
398  
399  
400  
401  
402  
403  
404  
405  
406  
407  
408  
409  
410  
411  
412  
413  
414  
415  
416  
417  
418  
419  
420  
421  
422  
423  
424  
425  
426  
427  
428  
429  
430  
431  
432  
433  
434  
435  
436  
437  
438  
439  
440  
441  
442  
443  
444  
445  
446  
447  
448  
449  
450  
451  
452  
453  
454  
455  
456  
457  
458  
459  
460  
461  
462  
463  
464  
465  
466  
467  
468  
469  
470  
471  
472  
473  
474  
475  
476  
477  
478  
479  
480  
481  
482  
483  
484  
485  
486  
487  
488  
489  
490  
491  
492  
493  
494  
495  
496  
497  
498  
499  
500  
501  
502  
503  
504  
505  
506  
507  
508  
509  
510  
511  
512  
513  
514  
515  
516  
517  
518  
519  
520  
521  
522  
523  
524  
525  
526  
527  
528  
529  
530  
531  
532  
533  
534  
535  
536  
537  
538  
539  
540  
541  
542  
543  
544  
545  
546  
547  
548  
549  
550  
551  
552  
553  
554  
555  
556  
557  
558  
559  
560  
561  
562  
563  
564  
565  
566  
567  
568  
569  
570  
571  
572  
573  
574  
575  
576  
577  
578  
579  
580  
581  
582  
583  
584  
585  
586  
587  
588  
589  
590  
591  
592  
593  
594  
595  
596  
597  
598  
599  
600  
601  
602  
603  
604  
605  
606  
607  
608  
609  
610  
611  
612  
613  
614  
615  
616  
617  
618  
619  
620  
621  
622  
623  
624  
625  
626  
627  
628  
629  
630  
631  
632  
633  
634  
635  
636  
637  
638  
639  
640  
641  
642  
643  
644  
645  
646  
647  
648  
649  
650  
651  
652  
653  
654  
655  
656  
657  
658  
659  
660  
661  
662  
663  
664  
665  
666  
667  
668  
669  
670  
671  
672  
673  
674  
675  
676  
677  
678  
679  
680  
681  
682  
683  
684  
685  
686  
687  
688  
689  
690  
691  
692  
693  
694  
695  
696  
697  
698  
699  
700  
701  
702  
703  
704  
705  
706  
707  
708  
709  
710  
711  
712  
713  
714  
715  
716  
717  
718  
719  
720  
721  
722  
723  
724  
725  
726  
727  
728  
729  
730  
731  
732  
733  
734  
735  
736  
737  
738  
739  
740  
741  
742  
743  
744  
745  
746  
747  
748  
749  
750  
751  
752  
753  
754  
755  
756  
757  
758  
759  
760  
761  
762  
763  
764  
765  
766  
767  
768  
769  
770  
771  
772  
773  
774  
775  
776  
777  
778  
779  
780  
781  
782  
783  
784  
785  
786  
787  
788  
789  
790  
791  
792  
793  
794  
795  
796  
797  
798  
799  
800  
801  
802  
803  
804  
805  
806  
807  
808  
809  
810  
811  
812  
813  
814  
815  
816  
817  
818  
819  
820  
821  
822  
823  
824  
825  
826  
827  
828  
829  
830  
831  
832  
833  
834  
835  
836  
837  
838  
839  
840  
841  
842  
843  
844  
845  
846  
847  
848  
849  
850  
851  
852  
853  
854  
855  
856  
857  
858  
859  
860  
861  
862  
863  
864  
865  
866  
867  
868  
869  
870  
871  
872  
873  
874  
875  
876  
877  
878  
879  
880  
881  
882  
883  
884  
885  
886  
887  
888  
889  
890  
891  
892  
893  
894  
895  
896  
897  
898  
899  
900  
901  
902  
903  
904  
905  
906  
907  
908  
909  
910  
911  
912  
913  
914  
915  
916  
917  
918  
919  
920  
921  
922  
923  
924  
925  
926  
927  
928  
929  
930  
931  
932  
933  
934  
935  
936  
937  
938  
939  
940  
941  
942  
943  
944  
945  
946  
947  
948  
949  
950  
951  
952  
953  
954  
955  
956  
957  
958  
959  
960  
961  
962  
963  
964  
965  
966  
967  
968  
969  
970  
971  
972  
973  
974  
975  
976  
977  
978  
979  
980  
981  
982  
983  
984  
985  
986  
987  
988  
989  
990  
991  
992  
993  
994  
995  
996  
997  
998  
999  
1000

50  
51  
52  
53  
54  
55  
56  
57  
58  
59  
60

Though the evidence remains inconsistent at present, explanatory pathways include the over-activation of the HPA axis which interacts with the serotonin system and may ultimately result in serotonin depletion, increasing proneness to negative emotional states and reducing positive emotionality.[6,40,41] In addition, it has been proposed that the

1  
2  
3 energy-mobilising properties of cortisol may underlie an association with positive mental  
4  
5 wellbeing and that this pathway may be less relevant for understanding an association  
6  
7 between cortisol and mental ill health.[7] The evidence base is currently too limited to  
8  
9 determine whether diurnal cortisol is related to different components of positive mental  
10  
11 wellbeing and to negative mental health in the same way though there is some indication that  
12  
13 wellbeing and illbeing do not show the same correlations with cortisol slope.[10] The current  
14  
15 study used WEMWBS, designed to capture both hedonic and eudemonic wellbeing over the  
16  
17 last two weeks. Future research might explore a wider set of hedonic and eudemonic  
18  
19 components of mental wellbeing, as well as measures of mental ill health, in a single  
20  
21 analytical sample to establish whether they show the same or different relationships with  
22  
23 diurnal cortisol.  
24  
25  
26  
27  
28

29 Other limitations should be acknowledged. There were differences in the protocol for  
30  
31 the collection of cortisol. Morning serum cortisol was collected in one study and salivary  
32  
33 cortisol in the remaining three. Among those studies with salivary cortisol, morning average  
34  
35 cortisol was derived from samples taken at or before the typical peak (CaPS and NSHD) but  
36  
37 after the typical peak in NCDS, and cortisol levels differ considerably during this period.[42] In  
38  
39 addition, we excluded participants taking endocrine system medication in NCDS in contrast to  
40  
41 participants on cortico-steroid medication in the other studies though the former approach is  
42  
43 more conservative. Despite these differences we did not find evidence of between-study  
44  
45 heterogeneity in the estimates from the meta-analysis (with all  $I^2$  values below 21%). We used  
46  
47 clock time but cortisol patterns are more closely anchored to waking time. Participants were  
48  
49 instructed to provide samples at specified times post-waking but actual waking time was not  
50  
51 recorded. In addition, a maximum of four samples per day were collected and additional  
52  
53 measures may have provided more accurate assessment of diurnal cortisol, especially diurnal  
54  
55  
56  
57  
58  
59  
60

1  
2  
3 slope. We did not consider factors that may modify the prospective association between  
4  
5 cortisol and wellbeing, such as social support which has been shown to buffer the health  
6  
7 impact of stress.[43]  
8  
9

10  
11 Nevertheless, the current study also has strengths. It includes a large number of  
12  
13 participants (ranging from 1756 to 7515 in each analysis and considerably larger than any  
14  
15 previous study), in population-based samples, using harmonized measures of wellbeing and  
16  
17 covariates. Individual participant data meta-analysis was used, which has advantages over  
18  
19 aggregate meta-analysis including greater statistical power and standardization of the  
20  
21 derivation of variables and analytical models.[44]  
22  
23

24  
25 In summary, the findings from this meta-analysis do not provide support for the  
26  
27 hypothesis that cortisol profiles indicative of disrupted HPA axis functioning has strong  
28  
29 associations positive mental wellbeing in healthy middle-aged and older people. Of the four  
30  
31 diurnal cortisol levels considered here, only evening cortisol showed a prospective association  
32  
33 with wellbeing and only in minimally-adjusted analysis. However, cortisol was sampled on  
34  
35 only one or two days and studies with samples across multiple days may find stronger  
36  
37 associations if they better characterize cortisol patterns, though it seems likely that any  
38  
39 associations, if found, will be of modest to moderate magnitude.  
40  
41  
42  
43  
44  
45  
46  
47  
48  
49  
50  
51  
52  
53  
54  
55  
56  
57  
58  
59  
60



**Contributor statement:**

YBS, CC, CG, CP and DK conceptualised the study. MS, YBS, MG, MCG and RC identified the variables, cleaned the data and undertook data analysis. All authors contributed to reviewing and interpreting the results, commenting on the manuscript and approved the final version.

**Competing interests:**

Authors have no conflicts of interest to report.

**Funding:**

MS, RC and DK are supported by the UK Medical Research Council (Programme codes MRC\_MC\_UU\_12019/1; MRC\_MC\_UU\_12019/4; MRC\_MC\_UU\_12019/5). The MRC National Survey of Health and Development is funded by the UK Medical Research Council.

HALCyon was funded by the New Dynamics of Ageing (RES-353-25-0001) and MG was supported by this grant.

Data collection of cortisol in NCDS at 45 years was funded by the United Kingdom Medical Research Council, grant G0000934. This research was supported by the National Institute for Health Research Biomedical Research Centre at Great Ormond Street Hospital for Children NHS Foundation Trust and University College London.

The funders had no role in the study design, data collection, data analysis, data interpretation, writing of the report or the decision to submit the article for publication.

**Data sharing statement:**

MRC National Survey of Health and Development data used in this publication are available to bona fide researchers upon request to the NSHD Data Sharing Committee via a standard application procedure. Further details can be found at <http://www.nshd.mrc.ac.uk/data>. doi: 10.5522/NSHD/Q101; doi:10.5522/NSHD/Q102.

All requests for collaboration on the Caerphilly Prospective Study are reviewed by an independent steering committee (<http://www.bris.ac.uk/social-community-medicine/projects/caerphilly/collaboration/>).

National Child Development Study data are available via registration with the UK Data Service.

The Hertfordshire Cohort Study has governance and access arrangements that comply with MRC data sharing policy. The survey data are accessible to bona fide researchers by contacting Professor Cyrus Cooper, Director of the MRC Lifecourse Epidemiology Unit at the University of Southampton, who can forward a collaborators' agreement.

**Acknowledgements:**

The authors thank Stephanie Black for her contribution to data collation, statistical analysis and interpretation of the results presented here.

1  
2  
3 The authors are grateful to the Centre for Longitudinal Studies (CLS), UCL Institute of  
4 Education for the use of these data and to the UK Data Service for making them available.  
5 However, neither CLS nor the UK Data Service bear any responsibility for the analysis or  
6 interpretation of these data.  
7  
8  
9  
10  
11  
12  
13  
14  
15  
16  
17  
18  
19  
20  
21  
22  
23  
24  
25  
26  
27  
28  
29  
30  
31  
32  
33  
34  
35  
36  
37  
38  
39  
40  
41  
42  
43  
44  
45  
46  
47  
48  
49  
50  
51  
52  
53  
54  
55  
56  
57  
58  
59  
60

For peer review only

## REFERENCES

1. Herbert J, Goodyer IM, Grossman, AB, et al, Do corticosteroids damage the brain? *J Neuroendocrinol* 2006;18:393-411.
2. Kumari M, Badrick E, Sacker A, et al.2010a. Identifying patterns in cortisol secretion in an older population. Findings from the Whitehall II study. *Psychoneuroendocrinology* 2010;35:1091-9.
3. Lupien S, Lecours AR, Schwartz G, et al. Longitudinal study of basal cortisol levels in healthy elderly subjects: evidence for subgroups. *Neurobiol Aging* 1996;17:95–105.
4. Souza-Talarico, J. N. D., Marin, M. F., Sindi, S., & Lupien, S. J. (2011). Effects of stress hormones on the brain and cognition: evidence from normal to pathological aging. *Dementia & Neuropsychologia*, 5(1), 8-16.
5. Huppert FA, Whittington JE. Evidence for the independence of positive and negative well-being: implications for quality of life assessment. *Br J Health Psychol* 2003;8:107-22.
6. Braquehais MD, Picouto MD, Casas M, et al. Sher, L., 2012. Hypothalamic-pituitary-adrenal axis dysfunction as a neurobiological correlate of emotion dysregulation in adolescent suicide. *World J. Pediatr.* 8, 197-206.
7. Smyth N, Thorn L, Hucklebridge F, et al. Post awakening salivary cortisol secretion and trait well-being: The importance of sample timing accuracy. *Psychoneuroendocrinology* 2015;58:141-51.
8. Evans P, Forte D, Jacobs C, et al. Cortisol secretory activity in older people in relation to positive and negative well-being. *Psychoneuroendocrinology* 2007;32:922-930.

- 1  
2  
3 9. Adam EK, Hawkey LC, Kudielka BM, et al. Day-to-day dynamics of experience – cortisol  
4 associations in a population-based sample of older adults. *Proc Natl Acad Sci USA*  
5 2006;103:17058-63.  
6  
7  
8  
9  
10 10. Ryff CD, Love GD, Urry HL, et al. Psychological well-being and ill-being: do they have  
11 distinct or mirrored biological correlates? *Psychother Psychosom* 2006;75:85–95.  
12  
13  
14  
15 11. Smyth J, Ockenfels MC, Porter L, et al. Stressors and mood measured on a momentary  
16 basis are associated with salivary cortisol secretion. *Psychoneuroendocrinology* 1998;23:353–  
17 370.  
18  
19  
20  
21  
22 12. Lai JC, Evans PD, Ng SH, et al. Optimism, positive affectivity, and salivary cortisol. *Br J*  
23 *Health Psychol* 2005;10:467-84.  
24  
25  
26  
27  
28 13. Steptoe A, Wardle J. Positive affect and biological function in everyday life. *Neurobiol*  
29 *Aging* 2005;26 Suppl 1:108-12.  
30  
31  
32  
33 14. Steptoe A, Wardle J, Marmot M, et al. Positive affect and health-related neuroendocrine,  
34 cardiovascular, and inflammatory processes. *Proc Natl Acad Sci USA* 2005;102(18):6508-12.  
35  
36  
37  
38 15. van Eck M, Berkhof H, Nicolson N, et al. The effects of perceived stress, traits, mood  
39 states, and stressful daily events on salivary cortisol. *Psychosom Med* 1996;58:447-58.  
40  
41  
42  
43 16. Jacobs N, Myin-Germeys I, Derom C, et al. A momentary assessment study of the  
44 relationship between affective and adrenocortical stress responses in daily life. *Biol Psychol*  
45 2007;74:60–66.  
46  
47  
48  
49  
50 17. Porges SW. The polyvagal theory: New insights into adaptive reactions of the autonomic  
51 nervous system. *Cleve Clin J Med* 2009; 76(Suppl 2):S86–S90.  
52  
53  
54  
55 18. Kuh D, Cooper R, Richards M, et al. A life course approach to healthy ageing: the HALCyon  
56 programme. *Public Health* 2012;126:193-5.  
57  
58  
59  
60

- 1  
2  
3  
4  
5 19. The Caerphilly and Speedwell Collaborative Group. Caerphilly and Speedwell collaborative  
6 heart disease studies. *J Epidemiol Community Health* 1984;38:259–262.  
7  
8  
9  
10 20. Syddall HE, Aihie SA, Dennison EM, et al. Cohort profile: the Hertfordshire cohort study.  
11 *Int J Epidemiol* 2005;34:1234–1242.  
12  
13  
14  
15 21. Kuh D, Pierce M, Adams J, et al. Cohort Profile: updating the cohort profile for the MRC  
16 National Survey of Health and Development: a new clinic-based data collection for ageing  
17 research. *Int J Epidemiol* 2011;40:e1–e9.  
18  
19  
20  
21  
22 22. Power C, Elliott J. Cohort profile: 1958 British birth cohort (National Child Development  
23 Study). *Int J Epidemiol* 2006;35:34-41.  
24  
25  
26  
27  
28 23. Kirschbaum C, Hellhammer DH. Salivary cortisol in psychobiological research: an overview.  
29 *Neuropsychobiology* 1989;22:150–169.  
30  
31  
32  
33 24. Gale CR, Cooper R, Craig L, et al. Cognitive function in childhood and lifetime cognitive  
34 change in relation to mental wellbeing in four cohorts of older people. *PLoS One*  
35 2012;7(9):e44860.  
36  
37  
38  
39  
40 25. Tennant R, Hiller L, Fishwick R, et al. The Warwick-Edinburgh Mental Well-being Scale  
41 (WEMWBS): development and UK validation. *Health Qual. Life Outcomes* 2007;27(5):63.  
42  
43  
44  
45 26. Badrick E, Bobak M, Britton A, et al. The relationship between alcohol consumption and  
46 cortisol secretion in an aging cohort. *J Clin Endocrinol Metab* 2008;93:750–757.  
47  
48  
49  
50 27. Kumari M, Badrick E, Chandola T, et al. Measures of social position and cortisol secretion  
51 in an aging population: findings from the Whitehall II study. *Psychosom Med* 2010;72:27-34.  
52  
53  
54  
55  
56  
57  
58  
59  
60

1  
2  
3 28. Geoffroy MC, Li L, Power C. Depressive symptoms and body mass index: co-morbidity and  
4 direction of association in a British birth cohort followed over 50 years. *Psychol Med*  
5 2014;44:2641-2652.  
6  
7

8  
9  
10 29. Power C, Li L, Hertzman C. Cognitive development and cortisol patterns in mid-life:  
11 findings from a British birth cohort. *Psychoneuroendocrinology* 2008;33:530-9.  
12  
13

14  
15 30. Reid JD, Intrieri RC, Susman EJ, et al. The relationship of serum and salivary cortisol in a  
16 sample of healthy elderly. *J Gerontol* 1992;47:176–179.  
17  
18

19  
20 31. Adam EK, Kumari M. Assessing salivary cortisol in large-scale, epidemiological research.  
21 *Psychoneuroendocrinology* 2009;34:1423-36.  
22  
23

24  
25 32. DerSimonian R, Laird N. Meta-analysis in clinical trials. *Control Clin Trials* 1986;7:177-88.  
26  
27

28  
29 33. Berglund L. Regression dilution bias: Tools for correction methods and sample size  
30 calculation. *Upsala J Med Sci* 2012;117:279-83.  
31  
32

33  
34 34. Steptoe A, Gibson EL, Hamer M, et al. Neuroendocrine and cardiovascular correlates of  
35 positive affect measured by ecological momentary assessment and by questionnaire.  
36 *Psychoneuroendocrinology* 2007;32:56-64.  
37  
38

39  
40 35. Steptoe A, O'Donnell K, Badrick E, et al. Neuroendocrine and inflammatory factors  
41 associated with positive affect in healthy men and women: the Whitehall II study. *Am J*  
42 *Epidemiol* 2008;167:96-102.  
43  
44

45  
46 36. Hoppmann CA, Klumb PL. Daily goal pursuits predict cortisol secretion and mood states in  
47 employed parents with preschool children. *Psychosom Med* 2006;68:887-94.  
48  
49

50  
51 37. Davydov DM, Shapiro D, Goldstein IB, et al. Moods in everyday situations: effects of  
52 menstrual cycle, work, and stress hormones. *J Psychosom Res* 2005;58:343–349.  
53  
54  
55  
56  
57  
58  
59  
60

- 1  
2  
3 38. Simpson EE, McConville C, Rae, G., et al. Salivary cortisol, stress and mood in healthy older adults:  
4 the Zenith study. *Biol Psychol* 2008;78(1):1–9  
5  
6  
7  
8 39. Polk DE, Cohen S, Doyle WJ, et al. State and trait affect as predictors of salivary cortisol in  
9 healthy adults. *Psychoneuroendocrinology* 2005;30:261–272.  
10  
11  
12  
13 40. Dinan TG. Glucocorticoids and the genesis of depressive illness. A psychobiological model.  
14 *Br J Psych* 1994;164:365-71.  
15  
16  
17  
18 41. Stokes PE. The potential role of excessive cortisol induced by HPA hyperfunction in the  
19 pathogenesis of depression. *Eur Neuropsychopharm* 1995;77-82.  
20  
21  
22  
23 42. Vreeburg SA, Hoogendijk WJ, val Pelt J, DeRijk RH, Verhagen JC, van Dyck R et al. Major  
24 depressive disorder and hypothalamic-pituitary-adrenal axis activity: results from a large  
25 cohort study. *Arch Gen Psych* 2009;66:617-26.  
26  
27  
28  
29 43. Hostinar CE, Gunnar MR. Social Support Can Buffer against Stress and Shape Brain Activity.  
30 *AJOB Neurosci* 2015;6:34-42.  
31  
32  
33  
34 44. Riley RD, Lambert PC, Abo-Zaid G. Meta-analysis of individual participant data: rationale,  
35 conduct, and reporting. *Br Med J* 2010;340, 221.  
36  
37  
38  
39  
40  
41  
42  
43  
44  
45  
46  
47  
48  
49  
50  
51  
52  
53  
54  
55  
56  
57  
58  
59  
60

Table 1: Descriptive statistics of participants by study

|                                                                 | CaPS                     | HCS                     | NSHD                    | NCDS                    |
|-----------------------------------------------------------------|--------------------------|-------------------------|-------------------------|-------------------------|
| Sample with WEMWBS and cortisol; n                              | 592                      | 1055                    | 1736                    | 5337                    |
| Gender; n(%) male                                               | 530 (100)                | 463 (44)                | 809 (47)                | 2464 (50)               |
| Age range at cortisol measurement (years); [mean (sd)]          | 65 – 82<br>[72.8 (4.0)]  | 60 – 73<br>[66.6 (2.7)] | 62 – 64<br>[63.6 (0.8)] | 44 – 46<br>[44.1 (0.2)] |
| Age range at WEMWBS assessment (years); [mean (sd)]             | 73 - 90<br>[80.1 (3.9 )] | 69 – 78<br>[73.2 (2.4)] | 62 - 64<br>[63.6 (0.8)] | 50 – 51<br>[50.7(0.1)]  |
| Follow-up time cortisol to WEMWBS assessment (years); mean (sd) | 7.6 (0.4)                | 6.6 (1.2)               | 0                       | 6.6 (0.3)               |
| BMI (kg/m <sup>2</sup> ); mean(sd)                              | 28.2 (3.8)               | 26.9 (4.2)              | 27.9 (4.8)              | 27.1 (4.7)              |
| Adult current smoking status; n (%) smoker                      | 53 (11.0)                | 84 (8.1)                | 160 (10.2)              | 893 (18.5)              |
| Adult social class; n(%) manual                                 | 303 (59.5)               | 400 (39)                | 499 (29.2)              | 1626 (34.1)             |
| WEMWBS score; mean (sd)                                         | 53.3 (10.6)              | 51.7 (8.1)              | 51.8 (8.0)              | 49.5 (7.9)              |
| Sampling times; mean                                            |                          |                         |                         |                         |
| Waking sample                                                   | 7.37AM                   | N/A                     | 7.11AM                  | N/A                     |
| Waking + 30mins (+45 mins for NCDS)                             | 8.13AM                   |                         | 7.42AM                  | 8.11AM                  |
| Waking + 3h 45 mins                                             | N/A                      |                         | N/A                     | 11:11AM                 |
| 2pm sample                                                      | 2.11PM                   |                         | N/A                     | N/A                     |
| Evening sample                                                  | 10.05PM                  |                         | 9.27PM                  | N/A                     |
| Serum cortisol (nmol/L)                                         | N/A                      | 258.1 (81.2)            | N/A                     | N/A                     |
| Salivary cortisol (nmol/L)                                      |                          |                         |                         |                         |
| Early morning; mean (sd)                                        | 19.7 (9.5)               |                         | 22.9 (9.6)              | 21.3 (10.8)             |
| Night time; median (IQR)                                        | 2.3 (1.5, 3.5)           |                         | 2.4 (1.7,3.7)           | N/A                     |
| Diurnal slope (nmol/L/h); mean (sd)                             | -1.13 (0.7)              |                         | -1.43 (0.7)             | -4.3 (3.8)              |
| Cortisol Awakening Response; mean (sd)                          | 2.3 (9.4)                |                         | 6.4 (11.7)              | N/A                     |
| Exclusions due to being on corticosteroids; n(%) <sup>a</sup>   | 62 (10%)                 | 13 (1.2%)               | 19(1.1%)                | 396 (7.5) <sup>a</sup>  |

<sup>a</sup>endocrine medication



Table 2. Overall summary estimates of effect for the associations between cortisol measures and wellbeing from a series of meta-analyses.

|                                   | Included cohorts | Number of individuals | Mean difference in WEMWBS score (95% CI) per SD increase in cortisol |         |                                           |                      |                                 |         |                                           |                      |
|-----------------------------------|------------------|-----------------------|----------------------------------------------------------------------|---------|-------------------------------------------|----------------------|---------------------------------|---------|-------------------------------------------|----------------------|
|                                   |                  |                       | Model 1 <sup>a</sup>                                                 |         |                                           |                      | Model 2 <sup>b</sup>            |         |                                           |                      |
|                                   |                  |                       | Regression coefficient (95% CI)                                      | P-value | Tests of heterogeneity I <sup>2</sup> (%) | P-value <sup>c</sup> | Regression coefficient (95% CI) | P-value | Tests of heterogeneity I <sup>2</sup> (%) | P-value <sup>c</sup> |
| Early morning cortisol            | All              | 7515                  | 0.02<br>(-0.17,0.21)                                                 | 0.8     | 2.3                                       | 0.4                  | 0.01<br>(-0.22,0.24)            | 0.9     | 18.0                                      | 0.3                  |
| Evening cortisol                  | CaPS             | 1756                  | -0.47<br>(-1.00,0.05)                                                | 0.08    | 20.3                                      | 0.3                  | -0.31<br>(-0.83,0.21)           | 0.2     | 19.1                                      | 0.3                  |
| Flatter diurnal slope             | NSHD             |                       |                                                                      |         |                                           |                      |                                 |         |                                           |                      |
|                                   | CaPS             | 6490                  | -0.07<br>(-0.27,0.14)                                                | 0.5     | 0.0                                       | 0.6                  | -0.08<br>(-0.28,0.13)           | 0.5     | 0.0                                       | 0.6                  |
|                                   | NCDS             |                       |                                                                      |         |                                           |                      |                                 |         |                                           |                      |
| Cortisol awakening response (CAR) | CaPS             | 1612                  | -0.19<br>(-0.62, 0.24)                                               | 0.4     | 0.0                                       | 1.0                  | -0.16<br>(-0.59,0.26)           | 0.4     | 0.0                                       | 0.9                  |
|                                   | NSHD             |                       |                                                                      |         |                                           |                      |                                 |         |                                           |                      |

<sup>a</sup>sex, age at cortisol assessment, follow-up time to wellbeing assessment; <sup>b</sup>Model 1 plus body mass index, smoking status, adult social class; <sup>c</sup>p-values from Cochran's Q statistic performed as a test of between-study heterogeneity

1  
2  
3 Figure Legend  
4  
5  
6

7 Figure 1. Meta-analysis of the association between wellbeing and early morning cortisol (sex  
8 and follow-up time adjusted)  
9

10 Figure 2. Meta-analysis of the association between wellbeing and evening cortisol (sex and  
11 follow-up time adjusted)  
12

13 Figure 3. Meta-analysis of the association between wellbeing and flatter diurnal slope (sex  
14 and follow-up time adjusted)  
15

16 Figure 4. Meta-analysis of the association between wellbeing and cortisol awakening (sex and  
17 follow-up time adjusted)  
18  
19  
20  
21  
22  
23  
24  
25  
26  
27  
28  
29  
30  
31  
32  
33  
34  
35  
36  
37  
38  
39  
40  
41  
42  
43  
44  
45  
46  
47  
48  
49  
50  
51  
52  
53  
54  
55  
56  
57  
58  
59  
60

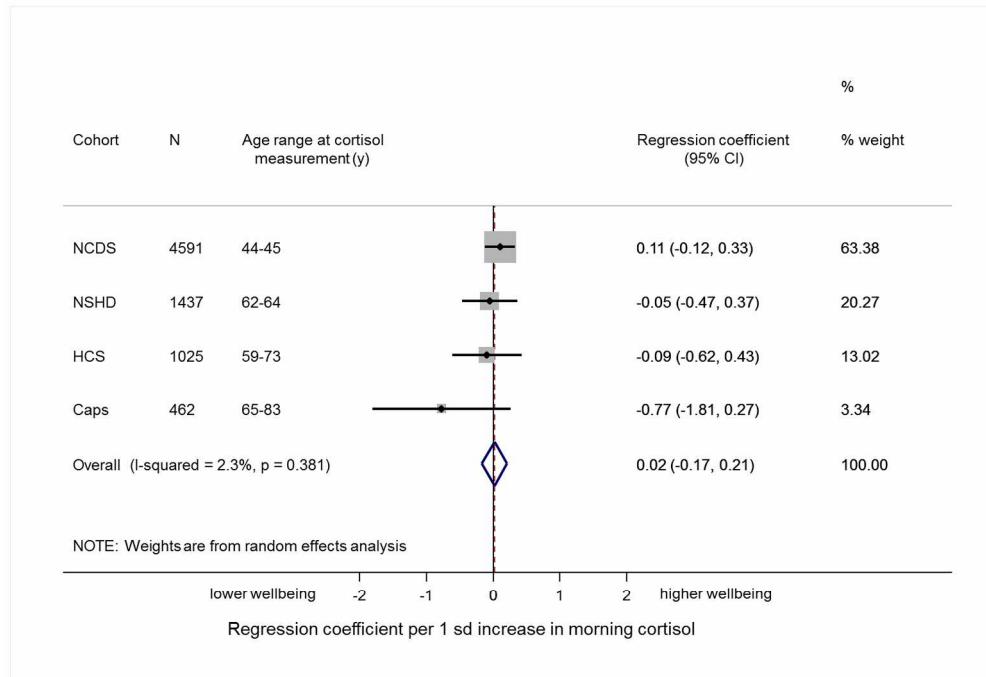

Figure 1

276x190mm (300 x 300 DPI)

View only

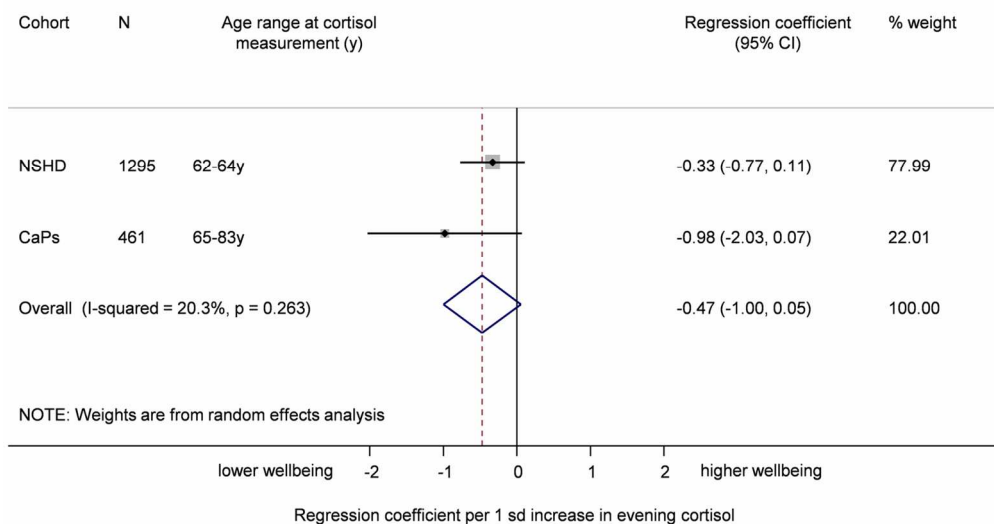

Figure 2

137x74mm (300 x 300 DPI)

review only

1  
2  
3  
4  
5  
6  
7  
8  
9  
10  
11  
12  
13  
14  
15  
16  
17  
18  
19  
20  
21  
22  
23  
24  
25  
26  
27  
28  
29  
30  
31  
32  
33  
34  
35  
36  
37  
38  
39  
40  
41  
42  
43  
44  
45  
46  
47  
48  
49  
50  
51  
52  
53  
54  
55  
56  
57  
58  
59  
60

1  
2  
3  
4  
5  
6  
7  
8  
9  
10  
11  
12  
13  
14  
15  
16  
17  
18  
19  
20  
21  
22  
23  
24  
25  
26  
27  
28  
29  
30  
31  
32  
33  
34  
35  
36  
37  
38  
39  
40  
41  
42  
43  
44  
45  
46  
47  
48  
49  
50  
51  
52  
53  
54  
55  
56  
57  
58  
59  
60

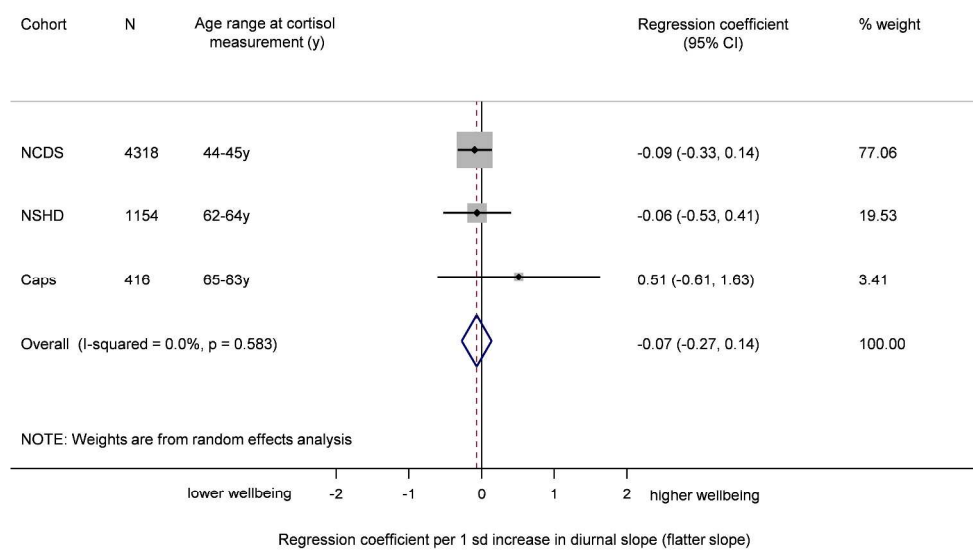

Figure 3

508x381mm (300 x 300 DPI)

ew only

1  
2  
3  
4  
5  
6  
7  
8  
9  
10  
11  
12  
13  
14  
15  
16  
17  
18  
19  
20  
21  
22  
23  
24  
25  
26  
27  
28  
29  
30  
31  
32  
33  
34  
35  
36  
37  
38  
39  
40  
41  
42  
43  
44  
45  
46  
47  
48  
49  
50  
51  
52  
53  
54  
55  
56  
57  
58  
59  
60

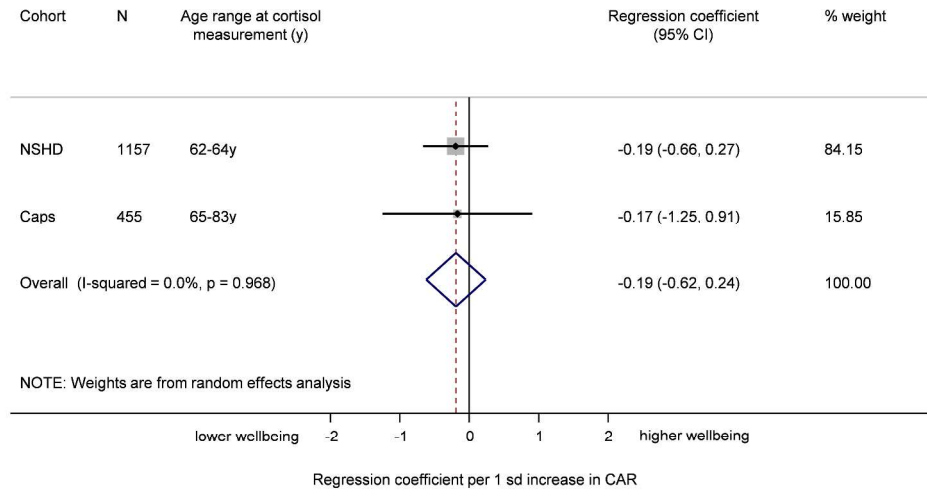

Figure 4

508x381mm (300 x 300 DPI)

ew only

## STROBE Statement—checklist of items that should be included in reports of observational studies

|                              | <b>Recommendation</b>                                                                                                                                                                | <b>Page</b> |
|------------------------------|--------------------------------------------------------------------------------------------------------------------------------------------------------------------------------------|-------------|
| <b>Title and abstract</b>    | (a) Indicate the study's design with a commonly used term in the title or the abstract                                                                                               | 1,2         |
|                              | (b) Provide in the abstract an informative and balanced summary of what was done and what was found                                                                                  | 1,2         |
| <b>Introduction</b>          |                                                                                                                                                                                      |             |
| Background/rationale         | Explain the scientific background and rationale for the investigation being reported                                                                                                 | 4           |
| Objectives                   | State specific objectives, including any prespecified hypotheses                                                                                                                     | 5           |
| <b>Methods</b>               |                                                                                                                                                                                      |             |
| Study design                 | Present key elements of study design early in the paper                                                                                                                              | 5           |
| Setting                      | Describe the setting, locations, and relevant dates, including periods of recruitment, exposure, follow-up, and data collection                                                      | 5,6         |
| Participants                 | (a) <i>Cohort study</i> —Give the eligibility criteria, and the sources and methods of selection of participants. Describe methods of follow-up                                      | 5,6         |
|                              | (b) <i>Cohort study</i> —For matched studies, give matching criteria and number of exposed and unexposed                                                                             | N/A         |
| Variables                    | Clearly define all outcomes, exposures, predictors, potential confounders, and effect modifiers. Give diagnostic criteria, if applicable                                             | 6-8         |
| Data sources/<br>measurement | For each variable of interest, give sources of data and details of methods of assessment (measurement). Describe comparability of assessment methods if there is more than one group | 5-7         |
| Bias                         | Describe any efforts to address potential sources of bias                                                                                                                            | 9-10        |
| Study size                   | Explain how the study size was arrived at                                                                                                                                            | 9, Table 1  |
| Quantitative variables       | Explain how quantitative variables were handled in the analyses. If applicable, describe which groupings were chosen and why                                                         | 10          |
| Statistical methods          | (a) Describe all statistical methods, including those used to control for confounding                                                                                                | 10-11       |
|                              | (b) Describe any methods used to examine subgroups and interactions                                                                                                                  | 11          |
|                              | (c) Explain how missing data were addressed                                                                                                                                          | 11          |
|                              | (d) <i>Cohort study</i> —If applicable, explain how loss to follow-up was addressed                                                                                                  | 11          |
|                              | (e) Describe any sensitivity analyses                                                                                                                                                | 11          |

Continued on next page

| <b>Results</b>           |                                                                                                                                                                                                              | <b>Page</b> |
|--------------------------|--------------------------------------------------------------------------------------------------------------------------------------------------------------------------------------------------------------|-------------|
| Participants             | (a) Report numbers of individuals at each stage of study—eg numbers potentially eligible, examined for eligibility, confirmed eligible, included in the study, completing follow-up, and analysed            | 9, Table 1  |
|                          | (b) Give reasons for non-participation at each stage                                                                                                                                                         |             |
|                          | (c) Consider use of a flow diagram                                                                                                                                                                           | N/A         |
| Descriptive data         | (a) Give characteristics of study participants (eg demographic, clinical, social) and information on exposures and potential confounders                                                                     | Table 1     |
|                          | (b) Indicate number of participants with missing data for each variable of interest                                                                                                                          |             |
|                          | (c) <i>Cohort study</i> —Summarise follow-up time (eg, average and total amount)                                                                                                                             |             |
| Outcome data             | <i>Cohort study</i> —Report numbers of outcome events or summary measures over time                                                                                                                          | Table 1     |
| Main results             | (a) Give unadjusted estimates and, if applicable, confounder-adjusted estimates and their precision (eg, 95% confidence interval). Make clear which confounders were adjusted for and why they were included | Table 2     |
|                          | (b) Report category boundaries when continuous variables were categorized                                                                                                                                    |             |
|                          | (c) If relevant, consider translating estimates of relative risk into absolute risk for a meaningful time period                                                                                             |             |
| Other analyses           | Report other analyses done—eg analyses of subgroups and interactions, and sensitivity analyses                                                                                                               | 12          |
| <b>Discussion</b>        |                                                                                                                                                                                                              |             |
| Key results              | Summarise key results with reference to study objectives                                                                                                                                                     | 13          |
| Limitations              | Discuss limitations of the study, taking into account sources of potential bias or imprecision. Discuss both direction and magnitude of any potential bias                                                   | 14          |
| Interpretation           | Give a cautious overall interpretation of results considering objectives, limitations, multiplicity of analyses, results from similar studies, and other relevant evidence                                   | 16          |
| Generalisability         | Discuss the generalisability (external validity) of the study results                                                                                                                                        | 13-14       |
| <b>Other information</b> |                                                                                                                                                                                                              |             |
| Funding                  | Give the source of funding and the role of the funders for the present study and, if applicable, for the original study on which the present article is based                                                | 17          |
